# Supplementary material
Source: Elsevier journal article supplement (https://www.sciencedirect.com/science/article/pii/S2530312019300074)
Supplement: mmc1 [file S2530312019300074:mmc1.doc]

Anexo A. Características de los estudios incluidos – Extracción de datos

Modeling  Smoking  Cessation:  Exploring  the  Use  of  a  Videotape  to  Help  Pregnant Women Quit Smoking. (Secker/1997)	
Diseño de estudio	Estudio controlado Aleatorizado	
Población	Mujeres Fumadoras en promedio 1 o más cigarrillos al día en su primer visita prenatal.	
Lugar	Clínica de los servicios obstétricos integrales	
Tamaño de muestra (número de participantes)	67 Mujeres fumadoras	

Intervención	n=30
Asesoramiento para dejar de fumar de su obstetra o enfermera-partera + video de auto-ayuda + una hoja de sugerencias.	

Comparador	n=30
Asesoramiento  para  dejar  de  fumar  de  su  obstetra  o enfermera-partera + una hoja de sugerencias	
Hipótesis de investigación	No es clara	


Desenlaces	evaluados	y técnica de medición	Comportamiento de fumar (cuestionario)
Ambiente libre de humo
Creencias acerca de los efectos nocivos del tabaco sobre el feto,  se preocupan por  los efectos del tabaco sobre la propia salud de la mujer, la motivación para dejar de fumar, la motivación para seguir fumando, la confianza en dejar de fumar, y la intención de dejar de fumar durante el embarazo.
Auto reporte del consumo de tabaco: la concentración de monóxido de carbono exhalado, informes de intentos de abandono y la duración del tiempo de dejar de fumar	


Resultados	Tercera visita: 13 mujeres que habían visto el video tuvieron una actitud media significativamente mayor para dejar de fumar al inicio del estudio, el 3,3 ± 0,4 (DE), en comparación con las 8 mujeres que no habían visto la cinta en esta visita, 2,7 ± 0,6 (DE), p = 0,02.
Grupo de intervención en la visita de la semana 36, el 79% informaron de uno o más intentos de abandono después de su primera visita prenatal en comparación con 44% en el grupo de comparación, p = .04. El periodo de tiempo promedio reportado de no fumar durante el embarazo fue sustancialmente más largo en el grupo de intervencion, 35,6 ± 63,7 días (n = 19), en comparación con 1,7 ± 3,2 días (n = 27) en el grupo de comparación, p
= .03.	
Tiempo de seguimiento	36 Semanas		
Pérdidas (%)	5%		
Fuente de financiación	No es claro		


Conclusiones	Este estudio sugiere que el uso de cintas de vídeo que modelan el cambio de comportamiento de fumar puede aumentar la eficacia de la ayuda para dejar de fumar que está generalmente disponible en las prácticas obstétricas y de la familia o las maternidades públicas.	
  Riesgo de sesgo 		
Sesgo	Evaluación	Apoyo para la Evaluación	
Generación de la Secuencia aleatorizada	
No claro	Cita:”were randomly assigned to receive” Comentario: no hay información suficiente acerca del proceso de generación aleatoria.	
Ocultación de la asignación	No claro	Comentario: No describen que se realizó la ocultación de la asignación.	
Cegamiento de los participantes y del personal	
Alto	Comentario: No realizaron ningún cegamiento y es probable que esto afecte los resultados	
Cegamiento de los evaluadores	
Alto	Comentario:	No realizaron ningún cegamiento y es probable que esto afecte los resultados	
Manejo de los datos de resultado incompletos	Bajo	Comentario:   los   datos   faltantes   fueron pocos y fue proporcional en los grupos	
Notificación selectiva de los resultados	
Alto	Comentario: No incluyo resultados para un resultado clave de esperar de este tipo de estudios	


The impact of educational interventions on modifiable risk factors for osteoporosis after a fragility fracture. (Bessette/2011)	
Diseño de estudio	Ensayo controlado aleatorizado	
Población	Mujeres mayores de 50 años con algún tipo de fractura	
Lugar	Hospital en la provincia Quebec Canadá	


Tamaño de muestra (número de participantes)	n= 2,010 Aceptaron aleatorización n=60 no aceptaron
De	las	2010=	1174	mujeres	sin	diagnóstico	ni tratamiento
Y 1314 sin tratamiento
Mujeres sin diagnostico ni tratamiento
Grupo   de   intervención   1:   Videocassett   +   material escrito:409
Grupo de intervención 2: Material escrito:379 Grupo control: 386
Mujeres sin tratamiento
Grupo   de   intervención   1:   Videocassett   +   material escrito:455
Grupo de intervención 2: Material escrito:419 Grupo control: 440	
Intervención	Grupo1: Videocassett + material escrito Grupo 2: Material escrito	
Comparador	Sin intervención	

Hipótesis de investigación	Comparar la efectividad de dos intervenciones educativas en la atención estándar para el aumento de la tasa de diagnóstico y tratamiento de la osteoporosis	
Desenlaces	evaluados	y técnica de medición	Impacto en la tasa de diagnóstico y tratamiento La adherencia a las intervenciones	


Resultados	La proporción de adherencia sin diagnostico ni tratamiento para los que leyeron el documento es en el grupo 1 fue del 87% y del grupo 2 fue del 89%. Para los que vieron el video fue del 62% (grupo 1).
La taza de tratamiento para el grupo de mujeres sin diagnóstico y tratamiento fue del 8% para el grupo control y el 12% para el grupo 2 (p=0.0516), y 11% para el grupo 1 (p=0.1573).
En grupo de sin tratamiento, la terapia de osteoporosis fue inicialmente en el grupo control del 10%, del 13% en el grupo 2 (p=0.1071), y el 13% del grupo 1 (p=0.2383)	
Tiempo de seguimiento	18 meses	
Pérdidas (%)	Del total de 2070= 97 (4,6%) retiró, muerto, o se negó a seguir; 17 (0,8%) se negó a seguir el cuestionario	
Fuente de financiación	No es claro	


Conclusiones	En general, el enfoque educativo, ya sea a través de material impreso o cinta de vídeo, no era eficaz en el aumento el diagnóstico o tratamiento de la osteoporosis después de una fractura por fragilidad.	
  Riesgo de sesgo 		
Sesgo	Evaluación	Apoyo para la Evaluación	

Generación de la Secuencia aleatorizada	
Bajo	Cita: “Randomization was stratified by socio-sanitary region (three in total) with use of a computer-generated sequence of random numbers”	
Ocultación de la asignación	Alto	Comentario: Probablemente no realizado.	
Cegamiento de los participantes y del personal	
No claro	Comentario:	El  estudio  no  abordo  este resultado	
Cegamiento de los evaluadores	
Alto	Comentario: No realizaron ningún cegamiento y es probable que esto afecte los resultados	
Manejo de los datos de resultado incompletos	Bajo	Comentario: Son bajos y equilibrados	
Notificación selectiva de los resultados	Alto	Comentario:  se  hizo  análisis  Post  Hoc  y ahí resultados que no se muestran	


Informed consent for ankle fracture surgery: patient comprehension of verbal and videotaped information. (Rossi/2004)	
Diseño de estudio	Ensayo clínico Aleatorizado	

Población	Pacientes con fracturas de tobillo que requieren intervención quirúrgica durante un período de 9 meses Mayores 18 años	
Lugar	No es claro	
Tamaño de muestra (número de participantes)	n=48
Grupo control= 25 Grupo Intervención=23	
Intervención	Cinta  de  video  preparado  específicamente  para  este estudio	
Comparador	Información convencional verbal sobre la cirugía	


Hipótesis de investigación	La información grabada en vídeo sobre la cirugía de fractura de tobillo mejoraría la comprensión del paciente en comparación con la información convencional verbal, especialmente en pacientes con niveles educativos más bajos.	


Desenlaces	evaluados	y técnica de medición	Evaluación de la compresión y retención del conocimiento mediante un cuestionario de 12 preguntas de opción múltiple.	


Resultados	El grupo intervención respondió el cuestionario inicial en promedio 9.3 (77.5%) de las 12 preguntas correctamente comparado con un 6,64 (55,3%) en el grupo control (p=0,0002). En el cuestionario de seguimiento, el grupo intervención en promedio respondió 8,17 (68,1%) respuestas correctas en comparación con 6,42 (53,5%) en el grupo control (p=0,0139).
Para los pacientes con más de una educación de grado 12, la diferencia en el rendimiento entre los grupos de intervención y control (10,3 frente a 7,86 correcta) también fue significativa (p = 0,0017).	
Tiempo de seguimiento	1 mes		

Pérdidas (%)	11 pérdidas totales durante el seguimiento   (23%), 5 del grupo e intervención y 6 del grupo control	
Fuente de financiación	No lo mencionan	


Conclusiones	Los pacientes que observaron la información grabadas en vídeo antes de dar el consentimiento para la cirugía de fractura de tobillo demostraron una mayor comprensión global de los riesgos, beneficios, alternativas y tratamiento postoperatorio en comparación con los pacientes que recibieron información verbal. No está claro si la diferencia observada en este estudio se basa en una presentación que es más fácil de entender o de la exposición a la información más precisa dado durante el proceso de consentimiento.	
  Riesgo de sesgo 		
Sesgo	Evaluación	Apoyo para la Evaluación	


Generación de la Secuencia aleatorizada	


No claro	Cita: “The subjects were randomized into either a conventional or study group after being block randomized by educational level (≤ 12th grade or > 12th grade) to
determine the effect that education has on comprehension	and	retention	of information received. Institutional” Comentario: No especifica el proceso de generación	
Ocultación de la asignación	Alto	Comentario: probablemente no realizado	


Cegamiento de los participantes y del personal	
No claro	Comentario:	El  estudio  no  abordo  este resultado	
Cegamiento de los evaluadores	
Alto	Comentario: No realizaron ningún cegamiento y es probable que esto afecte los resultados	

Manejo de los datos de resultado incompletos	

Bajo	Cita:”Since an almost equal number of patients were lost from each group, it was assumed that this would affect both almost equally, and thus, the available data for followup were analyzed”	
Notificación selectiva de los resultados	Bajo	Comentario:	describen	que	hay	un protocolo y lo siguieron	


Evaluating the benefits of a patient information video during the informed consent process. (Weston/1997)	
Diseño de estudio	Ensayo clínico aleatorizado	
Población	Las mujeres que hablaran Inglés y entre 20-32 semanas de gestación.	
Lugar	Hospital in Toronto, Ontario, Canadá.	
Tamaño de muestra (número de participantes)	n=90 mujeres Grupo control: 48
Grupo intervención: 42	

Intervención	Recibían información escrita acerca de este ensayo perinatal y ver un video de la información (The Term Prelabour Rupture of the Membranes (Term PROM) study).	
Comparador	Solo información escrita	


Hipótesis de investigación	Evaluar el efecto de este video en: la disposición de las mujeres para participar, sus puntos de vista de que el Estudio valía la pena y capacidad de comprender y retener información sobre: (a) la rotura prematura de las membranas a término; (B) los riesgos y beneficios asociados de su cuidado y (c) diversos aspectos del estudio protocolo.	


Desenlaces	evaluados	y técnica de medición	Disposición para la participación futura en del estudio Term PROM a largo plazo en caso de ser elegible.
Vistas de las mujeres sobre la importancia del Term PROM, el conocimiento del protocolo de estudio, y  la ruptura prematura plazo de las membranas plazo. Mediante un cuestionario	


Resultados	Pregunta en el cuestionario inicial "Si usted tuviera PROM cuando llegue a término, ¿cree que le gustaría participar en el Estudio de la RPM a término?", grupo de video 61,9% respondieron si vs. 35,4% grupo control (p= 0,01). A las 2-4 fue 56.1 Vs 38.6 respectivamente (p=0.11)
Numero de respuestas correctas del contenido:
Inicial: grupo intervención de 9-11 preguntas 95.2% y grupo control 87.5% (p=0.2)
2-4 semanas: grupo intervención de 9-11 preguntas 87.8% y grupo control 63.6% (p=0.01)	
Tiempo de seguimiento	2-4 semanas	
Pérdidas (%)	(5,8%)
3 no respondió, y 2 partos prematuros	
Fuente de financiación	Medical Research Council of Canada (MRC) grant # MA- 11392	


Conclusiones	Se encontró que la proyección de un vídeo de la información del paciente puede aumentar la disposición de las mujeres para participar en un ensayo de investigación y puede tener el efecto adicional de educarlos sobre el problema de salud y los detalles del ensayo. Esta disposición a participar parece disminuir con el tiempo y por lo tanto un video de información del paciente puede ser más útil en el momento de solicitar el consentimiento informado.	
  Riesgo de sesgo 		
Sesgo	Evaluaci ón	Apoyo para la Evaluación	
Generación de la Secuencia aleatorizada	
Bajo	Cita:” A randomization list was generated using a random numbers table and held centrally at the Data Coordinating Centre”	

Ocultación de la asignación	

Alto	Cita:”	The	study		nurse	obtained	each participant’s allocation assignment by phone from a member of the study staff.” Comentario:		es	un	procedimiento		no ocultado	
Cegamiento de los participantes y del personal	
Alto	
Comentario: ningún cegamiento	
Cegamiento de los evaluadores	
Alto	Comentario:	No realizaron ningún cegamiento y es probable que esto afecte los resultados	
Manejo de los datos de resultado incompletos	No claro	Comentario:   el   estudio   no   abordo   este resultado	
Notificación selectiva de	No claro	Comentario: No hubo información suficiente	


los resultados			


A randomised controlled study of an audiovisual patient information intervention on informed consent and recruitment to cancer clinical trials. (Hutchison/2007)	
Diseño de estudio	Ensayo clínico fase III aleatorizado	
Población	Pacientes  diagnosticados  con  cáncer  colo-rectal  o  de mama o de pulmón	
Lugar	No es claro	
Tamaño de muestra (número de participantes)	n= 173
Grupo control: 87
Grupo de intervención: 86	

Intervención	Información audiovisual (AVPI): información de ensayos clínicos de sitio específico genérico y el cáncer, con un enfoque particular sobre el concepto de asignación al azar.	
Comparador	Práctica  estándar  actual  en  el  departamento  para  la discusión de los ensayos clínicos con pacientes.	

Hipótesis de investigación	Determinar el efecto de AVPI (a) las tasas de rechazo a los ensayos de cáncer aleatorios (b) el conocimiento y la ansiedad y (2) para  investigar las percepciones  de la AVPI de los pacientes.	


Desenlaces	evaluados	y técnica de medición	Decisión de Ensayo clínico: aceptación o rechazo en la participación.
Cuestionario de conocimiento
Evaluación de la ansiedad (Spielberger State and Trait Anxiety Inventory)
Percepción de AVPI	


Resultados	Estimación de OR de rechazo (Intervención/Control) de 1,19 (p=0.661, 95% IC 0,55-2,58).
La diferencia en el cambio del porcentaje de puntuación entre los grupos (p=0.011, p=0.0072).
La diferencia de medianas estimadas en el puntaje en cambio de conocimiento entre grupos es de 5 (95% IC 0.0-16.7)
El cambio en la puntuación de ansiedad entre los brazos (p=0.001 y p=0.011). La diferencia de medianas estimadas en la puntuación de cambio de la ansiedad entre los grupos es -4,6 (IC del 95% -7.0 a -2.0).	
Tiempo de seguimiento	1 semana	
Pérdidas (%)	24%	
Fuente de financiación	No lo mencionan	

Conclusiones	A pesar de las limitaciones, los hallazgos de este estudio apoyan el uso del AVPI como una adición útil al proceso de consentimiento para los ensayos de cáncer aleatorios	


	en cuanto a la mejora del conocimiento y la comprensión del paciente antes de la toma de decisiones. Parece reducir la ansiedad en este punto de tiempo y ha demostrado ser un medio aceptable para los pacientes.
En este estudio, AVPI no ha demostró tener ningún efecto sobre las tasas de rechazo a los ensayos de cáncer aleatorios. Además el trabajo se centra en AVPI específico para los ensayos individuales sería de gran ayuda para determinar si un enfoque más personalizado en relación con el reclutamiento de ensayos clínicos.	
  Riesgo de sesgo 		
Sesgo	Evaluación	Apoyo para la Evaluación	


Generación de la Secuencia aleatorizada	


Bajo	Cita:”randomised to intervention or no interven- tion (1 : 1) by contacting the CRUK Clinical Trials Unit (CTU). The study was stratified for individual trial, tumour type, age and sex using the minimisation method, which was implemented in the CTU’s Oracle database”	
Ocultación de la asignación	Alto	Comentario: probablemente no realizado	
Cegamiento de los participantes y del personal	
Alto	
Comentario: ningún cegamiento	
Cegamiento de los evaluadores	
Alto	Comentario: No realizaron ningún cegamiento y es probable que esto afecte los resultados	

Manejo de los datos de resultado incompletos	
Bajo	Cita:”An	intention-to-treat	analysis
including all patients”
Comentario: utilizo un método apropiado para los datos faltantes	
Notificación selectiva de los resultados	No claro	Comentario:	No	hubo	información suficiente	


Do audio-guided decision aids improve outcomes? A randomized controlled trial of an audio-guided decision aid compared with a booklet decision aid for Australian women considering labour analgesia. ( Raynes /2009)	
Diseño de estudio	Estudio clínico aleatorizado	
Población	Mujeres  (primíparas),  al  final  del  embarazo  estaban planeadas para un parto vaginal de un solo bebé	
Lugar	Sydney, Australia en dos hospitales obstétricos	
Tamaño de muestra (número de participantes)	n=395
Intervención: (n = 193)	


	comparador: (n = 202)	
Intervención	Ayuda en al decisión guiada por audio (folleto + CD)	
Comparador	Folleto de ayuda de decisión	
Hipótesis de investigación	No es claro	


Desenlaces	evaluados	y técnica de medición	Evaluación de los resultados primarios de conocimiento, conflicto de decisiones (la incertidumbre respecto a la decisión) y la ansiedad (mediante un cuestionario)
El conocimiento de analgesias en el parto opciones y los resultados se evaluaron utilizando un  20-ítem preguntas.
También se examinaron una serie de tanto afectiva (ansiedad, satisfacción y participación en la toma de decisiones) y los resultados conductuales (intención y decisión real tomada y actuar en consecuencia)
Se utilizó la escala estado de la Spielberger State-Trait Anxiety Inventory para medir la ansiedad	


Resultados	Ambos grupos informaron alto cumplimiento 99,4% grupo de intervencion en comparación con 98,3% control (d.f. = 1, x2 = 0,808, p=0369)
Diferencias de media del puntaje de conocimiento (% de respuestas correctas)  1.7 (95% IC –7.5, 4.2)
Diferencias de media de conflicto de decisiones  (0–100, 0 = low decisional conflic)   0.7 (95% IC 1.4, 2.9) Diferencias de media de Ansiedad  ( 20–80, 20 = low anxiety)	0.2 (95% IC 1.7, 2.7)	
Tiempo de seguimiento	3 meses	
Pérdidas (%)	Intervención 20%
Control 24%	
Fuente de financiación	No es claro	


Conclusiones	Este estudio es el primero en probar la eficacia relativa de un formato de audio-guiada en comparación con una versión escrita de una ayuda a la decisión. Para los resultados primarios no hubo diferencias en el conocimiento medio, conflicto de decisiones o de los niveles de ansiedad entre los dos grupos de ayuda a la decisión. Estos resultados sugieren  que la decisión ayudas no son necesariamente realzadas por la presentación auditiva y que los métodos escritos y gráficos de presentación de información sobre los riesgos que se utilizan tradicionalmente en la ayuda en la decisión puede ser suficiente para incrementar el conocimiento, sin aumentar la incertidumbre de toma de	


	decisiones o la ansiedad.	
  Riesgo de sesgo 		
Sesgo	Evaluación	Apoyo para la Evaluación	
Generación de la Secuencia aleatorizada	
Bajo	Cita:”Treatment allocation was randomly generated by computer using random variable block sizes”	

Ocultación de la asignación	

Alto	Cita:”   It   was   not   possible   to   conceal allocation once randomized; however, to minimize   con-   tamination   a   research assistant worked at each centre and” Comentario: explicitamente no ocultado	

Cegamiento de los participantes y del personal	

No claro	Cita:   “   the   antenatal   staff   were   kept blinded  to  the  treatment  allocation  and the actual con- tent of the decision aid” Comentario. El personal no es evaluó este resultado	
Cegamiento de los evaluadores	
Alto	Comentario: No realizaron ningún cegamiento y es probable que esto afecte los resultados	

Manejo de los datos de resultado incompletos	

Bajo	Cita:”Analyses were by intention to treat. Study groups were compared in terms of baseline characteristics.”
Comentario: utilizo un método apropiado para los datos faltantes	
Notificación selectiva de los resultados	No claro	Comentario:	No	hubo	información suficiente	


Effects of an interactive CD-program on 6 months readmission rate in patients with heart failure - a randomised, controlled trial. (Linné/2006)	
Diseño de estudio	Estudio Multicentrico Aleatorizado	
Población	Pacientes con insuficiencia cardiaca	
Lugar	Hospital  general  de  mediano  y  pequeño  tamaño  en Suecia	
Tamaño de muestra (número de participantes)	n=230
108 control
122 intervención	

Intervención	Recibió una educación adicional mediante un programa interactivo sobre la insuficiencia cardiaca, sus síntomas y tratamiento. Este programa se llevó a unos 20-30 minutos	
Comparador	Información estándar	


Hipótesis de investigación	No es claro		

Desenlaces	evaluados	y técnica de medición	Diferencia en la tasa de todas las causas de readmisión y muerte dentro de los 6 meses después del alta.
Conocimiento general de los pacientes de insuficiencia cardíaca y su tratamiento se pusieron a prueba con un cuestionario.	


Resultados	En el grupo de control 52% de los pacientes alcanzaron el punto final combinado, en el grupo de intervención 49% pacientes.
Conocimientos: Los pacientes en el grupo  de intervención (n = 43) alcanzaron una puntuación significativamente más alta (puntuación media de 10,1 puntos del rango de 4-15) que el grupo control (n = 39), (puntuación media de 7,7 puntos, rango 2-14), p = 0,004	
Tiempo de seguimiento	6 meses		
Pérdidas (%)	2%		

Fuente de financiación	Grants from the Swedish Heart Lung Foundation,
the Council for Medical Health Care Research in South Sweden	


Conclusiones	La educación adicional de pacientes con IC con un programa interactivo no tuvo efecto sobre la tasa de reingreso o muerte dentro de los 6 meses después del alta. Las variables deben ser no sólo  el  conocimiento sino que también deben incluir el comportamiento del paciente (por  ejemplo, la autogestión) y un resultado clínico, tales como probado en nuestro estudio.	
  Riesgo de sesgo 		
Sesgo	Evaluación	Apoyo para la Evaluación	
Generación de la Secuencia aleatorizada	Bajo	Cita:	“Randomisation	was	made	by computer…”	
Ocultación de la asignación	No claro	Comentario: no se describe	
Cegamiento de los participantes y del personal	
Alto	
Comentario: ningún cegamiento	
Cegamiento de los evaluadores	
Alto	Comentario: No realizaron ningún cegamiento y es probable que esto afecte los resultados	
Manejo de los datos de resultado incompletos	Bajo	Comentario. Es bajo los datos faltantes	
Notificación selectiva de los resultados	No claro	Comentario:	No	hubo	información suficiente	


Randomized trial of a DVD intervention to improve readiness to self-manage joint pain. (Elander/2011)	
Diseño de estudio	Estudio clínico controlado aleatorizado longitudinal	
Población	Pacientes con hemofilia	
Lugar	Lista de miembros y registro de la Sociedad de Hemofilia del Reino Unido	
Tamaño de muestra (número de participantes)	n=196
Intervention: n=7 Control: n=99	


Intervención	DVD + folleto: destinado a aumentar la motivación al libre control del dolor
Descripción de los tipos de dolor en la hemofilia, el impacto del dolor en las emociones y otros aspectos de la vida, maneras +/- del uso de analgésicos, y las descripciones de los beneficios de afrontamiento activo y el ejercicio.	
Comparador	Folleto	
Hipótesis de investigación	No es claro	


Desenlaces	evaluados	y técnica de medición	El resultado primario fue la disposición de auto gestionar el dolor, medido por las 4 escalas de las etapas del dolor.
Los resultados secundarios fueron afrontamiento del dolor, la aceptación del dolor, y la calidad relacionada con la salud de la vida.	


Resultados	Los promedios marginales mostraron que entre el inicio y el seguimiento, pre contemplación se redujo de 2,95 (DE 0,12) a 2,79 (DE 0,11) entre los que se utilizó el folleto y de 2,73 (DE 0,11) a 2,68 (DE 0,10), entre los que se utiliza el DVD.
El uso de los 7 puntos de escalas, la correlación entre intervención y control fue de 0,65 (p <0,001), y ambos se correlacionaron significativamente con los cambios en pre contemplación (intervencion r = 0,312, p = 0,018; Control = 0,332, P = 0,012).	
Tiempo de seguimiento	6 meses	

Pérdidas (%)	44% total
intervención: 20%
control: 24%	

Fuente de financiación	The Haemophilia Society UK and the Institute for Health Policy and Research, London Metropolitan University. Baxter and Bayer Healthcare also made small contributions to the costs of the DVD production.	


Conclusiones	Los resultados muestran que las intervenciones de baja intensidad en formato DVD pueden mejorar el impacto motivacional de la información escrita, y podrían utilizarse para ayudar a preparar a las personas con dolor crónico para las intervenciones de autocuidado más intensivos. Los resultados son consistentes con un 2 fases, modelo motivacional-volitivo de auto-manejo del dolor, y proporcionan la  primera visión  a  nuestro conocimiento de la disposición de auto gestionar el dolor en casos de hemofilia	
  Riesgo de sesgo 		
Sesgo	Evaluación	Apoyo para la Evaluación	
Generación de la Secuencia aleatorizada	Bajo	Cita:	“A	computer-generated	random sequence of 0s and 1s…”	
Ocultación de la asignación	No claro	Comentario: no se describe	

Cegamiento de los participantes y del personal	

No claro	Cita:”Blind   allocation   was   achieved   by assigning	each	participant	a		study number in a sequence from 1 to 196” Comentario:	No		describen		si		los participantes sabían o no	
Cegamiento de los evaluadores	No claro	Comentario: el estudio no describe	
Manejo de los datos de resultado incompletos	Alto	Comentario:	se	presenta	una	gran cantidad de datos perdidos	
Notificación selectiva de los resultados	No claro	Comentario:	No	hubo	información suficiente	


A digital smoking cessation program delivered through internet and cell phone without nicotine replacement (happy ending): randomized controlled trial. (Brendryen/2008)	
Diseño de estudio	Estudio controlado aleatorizado	

Población	Voluntarios que querían dejar de fumar por un día prescrito sin el uso de reemplazo de nicotina y ser mayor de 18 años o más	
Lugar	Norwegian regional	
Tamaño de muestra (número de participantes)	n=296
Intervención 148
control 148	

Intervención	Intervención digital multimedia HE (Happy Ending es un programa intenso para dejar de fumar 1 año entregado a través de Internet y el teléfono celular.)	
Comparador	Folleto  de  44  páginas  de  autoayuda  emitido  por  la Dirección Nacional de Sanidad y Asuntos Sociales	


Hipótesis de investigación	Una intervención digital para dejar de fumar completamente automatizado produciría un incremento de abstinencia durante 12 meses comparado con una condición de control de un folleto de autoayuda. Por otra parte, se esperaba la intervención digital aumente los niveles de abandono de hacer frente a la planificación y la auto-eficacia. Por último, se espera que el aumento hipotético en el abandono del pre planificación y la auto- eficacia de afrontamiento para mediar parcialmente el efecto del tratamiento.	

Desenlaces	evaluados	y técnica de medición	Los datos de abstinencia se basan en auto-informes sin la comprobación bioquímica y se evaluaron a los 1, 3, 6, y 12 meses después de su finalización
Dependencia de la nicotina se evaluó mediante el test de Fagerström para la Dependencia de la Nicotina (FTND)	


Resultados	A la 1 mes después de dejar de fumar, el número fue significativamente mayor en el grupo de intervención (χ21 = 7,5, p=0 .006).
El principal hallazgo de este estudio fue que los participantes en la intervención presentaron tasas de abstinencia puntos repetidos; clínicamente y estadísticamente significativamente mayor (OR = 3,43, 95% CI = 1,60 a 7,34, P = 0,002). ( 1 + 3 + 6 + 12 months)

Al añadir TSN (terapia de reemplazo de nicotina) junto con las condiciones experimentales en un modelo de regresión logística, el OR se redujo a 2,86 (IC del 95% = 1.31 a 6.24, P = .008).	
Tiempo de seguimiento	12 meses	
Pérdidas (%)	Intervención=26 (8.7%)
Control=38 (12.8%)	


Fuente de financiación	This trial was made possible through cooperation and cofunding among the University of Oslo, Happy Ending AS, and the Norwegian Research Council.
The second author has a financial interest in the intervention under scrutiny, as a shareholder of Happy Ending AS.	


Conclusiones	Este ensayo demostró la eficacia de la intervención digital y totalmente automatizado (HE) para dejar de fumar sobre un folleto de autoayuda - condición sin el uso combinado de TSN -. La capacidad de HE para aumentar auto-eficacia de abandono podría explicar algo de éxito en la obtención de la abstinencia temprana.
La hipótesis de que iba a producir un aumento de la tasa de abstinencia, en comparación con  un grupo control que recibió un folleto de autoayuda, fue apoyado, incluso cuando se controla por el empleo de TSN.	
  Riesgo de sesgo 		
Sesgo	Evaluación	Apoyo para la Evaluación	
Generación de la Secuencia aleatorizada	Bajo	Cita:	”Based	on	computer-generated random digits”	
Ocultación de la asignación	
No claro	Cita:”concealed	to	the	experimenter during randomization”
Comentario: No se describe con detalle	
Cegamiento de los participantes y del personal	
No claro	Comentario:  El  estudio  no  abordo  este resultado	
Cegamiento de los evaluadores	No claro	Comentario: el estudio no describe	
Manejo de los datos de resultado incompletos	
Bajo	Cita: “Outcomes were examined using the intent-to-treat principle (ie, missing was counted as smoker”	
Notificación selectiva de los resultados	Bajo	Cumplieron	objetivos	y	emplearon métodos pre-especificados	


Computerized, interactive, multimedia cognitive-behavioural program for anxiety and depression in general practice. (Proudfoot/2003)	
Diseño de estudio	Estudio controlado aleatorizado	
Población	pacientes  adultos  con  ansiedad  y/o  depresión  de  en atención primaria	
Lugar	London and south-east England	
Tamaño de muestra (número de participantes)	n=167
Intervención (n = 89) Control (TAU) (n = 78)	

Intervención	Terapia con ordenador, Beating the Blues (BtB), consiste en nueve clases, comenzando con un video introductorio de 15 minutos, seguido de ocho sesiones de terapia.	
Comparador	Tratamiento Usual	
Hipótesis de investigación	¿El	BtB	mejorar	la	ansiedad	y/o	depresión,	en comparación con el tratamiento habitual en la práctica	


	general?		


Desenlaces	evaluados	y técnica de medición	Cinco medidas de resultado fueron administradas en cada uno de cinco ocasiones: pretratamiento, 2 meses despues, con un seguimiento a los 1, 3 y 6 meses.
Beck Depression Inventory II (BDI): es una medida establecida 21 items de la severidad de la depresión.
Beck Anxiety Inventory (BAI): es una lista de síntomas de 21 ítems valorados en una escala de cuatro puntos (0- 3).
Work and Social Adjustment Scale (WSA): mide el grado en que los problemas del paciente interfieren con la capacidad de trabajo, administración del hogar, la vida social, el ocio y las relaciones privadas.	


Resultados	Media de la depresión: 1 mes con el control 16.10 (DE 11.9) y del grupo intervención 12.5 (DE 12.3), 6 mes con el control 16.07 (DE 13.6) y del grupo intervención 9.6 (DE 10.06)
Media de la Ansiedad: 1 mes con el control 12.6(DE 9.9) y del grupo intervención 10.4 (DE 8.6), 6 mes con el control 11.3 (DE 9.6) y del grupo intervención 8.7 (DE 7.6)
Media de la problemas del paciente: 1 mes con el control
14.5 (DE 10) y del grupo intervención 12 (DE 9.4), 6 mes con el control 12.1 (DE 10) y del grupo intervención 9.1 (DE 8.9)	
Tiempo de seguimiento	8 meses		
Pérdidas (%)	Intervención 37%
Control 35%	

Fuente de financiación	The study was funded by the NHS Executive London (NHSE – LRO), Research & Development, Responsive Funding Programme	


Conclusiones	Nuestros resultados demuestran mejoria significativa y rápida, en relación con el tratamiento habitual, cuando un programa computarizado de técnicas cognitivo- conductuales, Beating the Blues, se administró a los pacientes en atención primaria que sufren de ansiedad, la depresión y la depresión mixta. Las mejorias observadas fueron de importancia clínica, así como estadística: después del tratamiento con BtB, las puntuaciones medias de la depresión y la ansiedad cayeron al rango casi normal.	
  Riesgo de sesgo 		
Sesgo	Evaluación	Apoyo para la Evaluación	
Generación de la	Bajo	Cita:” Randomly sorted cards naming one	


Secuencia aleatorizada		of the two treatments”	
Ocultación de la asignación	
No claro	Cita: “ which were sealed and numbered” Comentario: es incierto si los sobres eran oscuros	
Cegamiento de los participantes y del personal	
No claro	
Comentario: No se menciona en el estudio	
Cegamiento de los evaluadores	No claro	Comentario: No se menciona en el estudio	
Manejo de los datos de resultado incompletos	Alto	Comentario:  las  pérdidas  fueron  altas  y además afectando los resultados	
Notificación selectiva de los resultados	
Alto	Comentario: El estudio no incluyo resultados claves en la comparación entre los grupos.	


Randomized controlled trial comparing the efficacy of a video and information leaflet versus information leaflet alone on patient knowledge about surveillance and cancer risk in ulcerative colitis. (Eaden/2002)	
Diseño de estudio	Ensayo clínico aleatorizado	
Población	Pacientes con colitis ulcerativa mayores de 18 años	
Lugar	Leicester,  Inglaterra  (Leicester  General  Hospital  and Leicester Royal Infirmary)	
Tamaño de muestra (número de participantes)	115 pacientes
Intervención: 56
Control. 59	
Intervención	Video + Folleto	
Comparador	Folleto	

Hipótesis de investigación	Mejorar el conocimiento del cáncer en pacientes con CU y evaluar si esto se logra mejor mediante el uso de un folleto de información al paciente o al ver el video y leer el folleto informativo	


Desenlaces	evaluados	y técnica de medición	Se evaluo el grado de conocimiento de los pacientes con colitis ulcerativa respecto al riesgo de cancer colorrectal antes, inmediatamente y un mes después de la respectiva intervención. La medición se hizo utilizando un cuestionario de 12 preguntas [Había 8 preguntas acerca Ca colorrectal]	


Resultados	La mejoría media en las calificaciones de las preguntas sobre el cáncer en 1 mes en comparación con línea de base fue de 1,5 para el grupo de folleto y 2,0 para el grupo de video (diferencia=0,5; IC del 95%= -1,2-0,14, p=0,13)
Considerando todas las 12 preguntas Después de 1 mes, porcentaje medio de mejoría había disminuido a 36% (95% CI= 23,7-48,6) en el grupo de solo folleto y a 55% (95% CI= 33,2-75,8) en el grupo vídeo (diferencia= 19%,
CI 95%= -43,3 a 6,6, p=0,15).
Solo las 8 preguntas de Ca Colo-rectal al mes, esto había disminuido al 57% (95% CI= 33,5-80,1) para grupo del folleto y el 77% (95% CI= 49,5-105,1) para los que vieron el video (diferencia= 20%, 95% CI= -57,2 a 16,2, p=0,3).	
Tiempo de seguimiento	1 mes	
Pérdidas (%)	No hubieron perdidas	
Fuente de financiación	The funding for the production of the video gwas kindly	


	supplied by SmithKline Beecham Pharmaceuticals	

Conclusiones	Los videos y folletos tienen un rol  importante reforzando la información dada por el médico, sin embargo, no se encontró que el video tenga superioridad sobre la información aportada en el folleto.	
  Riesgo de sesgo 		
Sesgo	Evaluación	Apoyo para la Evaluación	
Generación de la Secuencia aleatorizada	No claro	Comentario:	No	hay	información suficiente para acerca del proceso	
Ocultación de la asignación	No claro	Comentario: No describe	
Cegamiento de los participantes y del personal	
No claro	
Comentario: No describe	
Cegamiento de los evaluadores	No claro	Comentario: No describe	
Manejo de los datos de resultado incompletos	Bajo	Comentario: No hubieron perdidas	
Notificación selectiva de los resultados	Bajo	Comentario: Resultados preespecificados	


Improving  informed  consent  for  patients  undergoing  radical  prostatectomy  using multimedia techniques: A prospective randomized crossover study. (Gyomber/2010)	
Diseño de estudio	Ensayo clínico aleatorizado cruzado	
Población	Pacientes  que  iban  a  ser  sometidos  a  prostatectomía radical	
Lugar	No se menciona	
Tamaño de muestra (número de participantes)	n=20
Intervención=20 Control=20	

Intervención	Presentación interactiva que provee información animada en esos aspectos y que incluye preguntas de selección múltiple sobre los aspectos presentados.	
Comparador	Información verbal con trabajadores en área de la salud, a través del consentimiento estándar.	


Hipótesis de investigación	Demostrar que no sólo la intervención mejora la comprensión del paciente en comparación con el grupo control, sino también mejora la comprensión de los pacientes que ya han estado expuestas al tratamiento usual	


Desenlaces	evaluados	y técnica de medición	Se realizó un test de 26 preguntas en el que se evaluaron los conocimientos de los pacientes tras la respectiva información, sobre aspectos críticos de la cirugía y sus implicaciones	


Resultados	Los resultados de las pruebas con una puntuación del 57 (64)% en el control vs 78 (81)% en intervención (p<0,001). Después de cruce las puntuaciones del grupo control mejoraron en un 11% en comparación con intervención (P <0,001). Las puntuaciones iniciales en intervención se mantuvieron sin cambios en el cruce y repetir la prueba.	
Tiempo de seguimiento	3 semanas		
Pérdidas (%)	No presento perdidas	
Fuente de financiación	No lo menciona	


Conclusiones	El uso de presentaciones multimedia interactivas es un método simple, costo-efectivo que parece incrementar el entendimiento del paciente de los riesgos y beneficios de la prostatectomía radical, cuando se compara con el consentimiento estándar. Además cuando el paciente entiende más sobre los procedimientos, se mejora la relación médico-paciente y el paciente firma realmente un consentimiento informado. Los pacientes refirieron que el método interactivo era fácil de usar y estaban satisfechos con la información obtenida.	
  Riesgo de sesgo 		
Sesgo	Evaluación	Apoyo para la Evaluación	
Generación de la Secuencia aleatorizada	Bajo	Cita:”randomised by computer”	
Ocultación de la asignación	No claro	Comentario: No describe	
Cegamiento de los participantes y del personal	
No claro	
Comentario: No describe	
Cegamiento de los evaluadores	No claro	Comentario: No describe	
Manejo de los datos de resultado incompletos	Bajo	Comentario: No hubieron perdidas	
Notificación selectiva de los resultados	
Alto	Comentario: No menciona un protocolo y no incluyo resultados claves que se esperaría de este tipo de estudio.	


Touch,  Caring,  and Cancer: randomized controlled trial  of a multimedia  caregiver education program. (Collinge/2012)	
Diseño de estudio	Estudio controlado aleatorizado	
Población	Pacientes con cáncer y sus cuidadores	
Lugar	Boston,   Massachusetts,   Portland,  Maine,   y   Portland, Oregon	
Tamaño de muestra (número de participantes)	n=97
Instrucciones escritas n=50 Video + manual n=47	

Intervención	Asistir a una reunión de orientación con otros temas en los que vieron DVD juntos y luego se les dio un paquete que contiene su propia copia del programa además de los materiales de la colección de datos.	

Comparador	Los cuidadores recibieron instrucciones de atención por teléfono y las instrucciones escritas para leer al paciente al menos tres veces por semana.	
Hipótesis de investigación	No es clara	

Desenlaces	evaluados	y técnica de medición	Evaluaron desenlaces: en cuidadores el cumplimiento de actividades, estrés percibido y actitudes; en el paciente el cambio en la gravedad de los síntomas, la calidad de vida y estrés. Mediante: PSS-10; 10-item Likert-scaled; FACT-G.	


Resultados	La proporción media de la sintomatología disminuyo durante las 4 semanas fue significativamente mayor en los pacientes con la intervención para tres de los síntomas: dolor (34 vs 18%, p=00.04), náuseas (29 vs. 12%, p=00.02), y otros síntomas auto-reportados (42 frente a 17%, p=00.02)	
Tiempo de seguimiento	1 mes	
Pérdidas (%)	Grupo de intervención 12%	

Fuente de financiación	Grant No. R44CA103606-3, Multimedia Technology Health Communication SBIR/STTR Grants, Health Communication Informatics Research Branch, National Cancer Institute, National Institutes of Health, USA	


Conclusiones	Reducciones significativas en todos los síntomas ocurrieron en los pacientes después de ambas intervenciones: 12-28% reducciones después control versus 29-44% después de intervención. Cuidadores en la condición del grupo intervención mostraron un aumento significativo de la confianza, la comodidad y la auto-eficacia. El control de la seguridad en las visitas domiciliarias parecía confirmar que la instrucción multimedia en relación con las medidas de seguridad fue efectiva.	


  Riesgo de sesgo 		
Sesgo	Evaluación	Apoyo para la Evaluación	
Generación de la Secuencia aleatorizada	
Bajo	Cita:”In cases of an odd number of dyads for an ethnicity, a coin flip determined the final dyad’s”	
Ocultación de la asignación	No claro	Comentario: No describe	
Cegamiento de los participantes y del personal	
No claro	
Comentario: No describe	
Cegamiento de los evaluadores	No claro	Comentario: No describe	
Manejo de los datos de resultado incompletos	
Alto	Comentario: la perdida no fue equitativa en los grupos y el método fue la imputación inadecuada	
Notificación selectiva de los resultados	No claro	Comentario:	No	hubo	información suficiente	


Approximal caries increment in adolescents after a visual aid in combination with a comprehensive open discussion. (Haggblom/2012)	
Diseño de estudio	Estudio controlado aleatorizado	
Población	Pacientes adolecentes de clínica dental publica (11-14 años)	
Lugar	Tibro, Sweden	
Tamaño de muestra (número de participantes)	n=334.
Intervención: n=167 Control n=167	
Intervención	Visual Caries Dialogue, VCD	
Comparador	Información tradicional de cuidado de la salud oral	

Hipótesis de investigación	El grupo intervención mostraría significativamente menos incremento de caries que los del grupo de control, en el seguimiento.	


Desenlaces	evaluados	y técnica de medición	El resultado de interés en este estudio fue de medidas de desarrollo de caries, aquí se llama DS-a (Decayed Surfaces-approximal). Radiografías de mordida estaban disponibles en todas las materias al inicio del estudio. Se sometieron a pruebas de regresión logística las diferencias entre los grupos con respecto a menos dos nuevas superficies proximales con caries.	


Resultados	Durante los 3 años de seguimiento, 18 (15,3%) pacientes en el grupo de intervención y 40 (35,7%) pacientes en el grupo de control tuvo un incremento en dos o más DS-a superficies. Hubo un riesgo menor en el grupo de intervención con una razón de riesgo de 2,34 (IC del 95% = 1,43-3,83) (odds ratio 3,09; p <0,001). Al ajustar el análisis de la experiencia anterior de caries proximales y al que el dentista se asignaron los sujetos, el odds ratio fue de 3,26 (p <0,001).	
Tiempo de seguimiento	3 años		
Pérdidas (%)	Intervención n=49 (29%) Grupo control n=55 (32%)	
Fuente de financiación	No lo menciona	


Conclusiones	El incremento de caries fue menor en el grupo de intervención en comparación con el grupo control. El método proporciona una innovadora forma sencilla y de bajo coste de la entrega de información a los pacientes y orienta al personal de salud dental.	
  Riesgo de sesgo 		
Sesgo	Evaluación	Apoyo para la Evaluación	
Generación de la Secuencia aleatorizada	Bajo	Cita:”using  computer-generated  random
numbers”	
Ocultación de la asignación	No claro	Comentario: No describe	
Cegamiento de los participantes y del personal	
No claro	
Comentario: No describe	
Cegamiento de los evaluadores	
Bajo	Cita: “an experienced dentist (AH) who was blinded to the patient’s name and study group allocation”	


Manejo de los datos de resultado incompletos	

Alto	Cita: “…There were no significant differences between the study groups regarding differences in proportions that dropped	out         between         2001–
2004(p=0.36)”
Comentario: las pérdidas fueron altas.	
Notificación selectiva de los resultados	No claro	Comentario:	No	hubo	información suficiente	


Evaluation of an Audiovisual Diabetes Education Program: negative results of a randomized trial of patients with non-insulin-dependent diabetes mellitus. (Mulrow/1987)	
Diseño de estudio	Ensayo Clínico Aleatorizado	


Población	Pacientes Diabéticos no insulino dependientes	
Lugar	St. Thomas' Hospital Diabetes Clinic in central London.	
Tamaño de muestra (número de participantes)	n=120; en cada grupo 40	

Intervención	Una cinta de vídeo estándar, lección escrita a un nivel educativo cuarto a sexto grado fue visto en cada sesión de 30 minutos, acompañado de folletos impresos.	


Comparador	Grupo 1: Reunión mensualmente en grupos de tres a cinco con la enfermera clínica. No se hizo ningún intento de estandarizar el material educativo o para adaptar específicamente las sesiones para los pacientes de alfabetización limitada.
Grupo 2 recibió la misma conferencia de una hora didáctica como el grupo 1, pero no fueron seguidos mensualmente.	
Hipótesis de investigación	No es claro	
Desenlaces	evaluados	y técnica de medición	Evaluar su comprensión de la diabetes y su gestión. Clínicos:  peso,  HbA1%,   triglicéridos  y  colesterol  se obtuvieron como medidas de resultado.	


Resultados	Un ANOVA usando grupos y pesos (variable dependiente)    fue    estadísticamente    significativa    (p
<0,05), y el promedio de pérdida kg visto en el grupo intervención fue estadísticamente significativa (p <0,05) El puntaje promedio de la prueba de evaluación de conocimientos a los siete meses fueron: grupo intervención, 75 por ciento; grupo control 1, 62 por ciento; y el grupo control 2, el 73 por ciento, y aquellos a los 11 meses fue del 72 por ciento, 65 por ciento, y 76 por ciento, respectivamente.	
Tiempo de seguimiento	11 meses	
Pérdidas (%)	42% a los 11 meses	
Fuente de financiación	Supported by a grant from Pfizer Pharmaceuticals	


Conclusiones	El programa de educación grupal con cinta de vídeo dirigido a pacientes diabéticos obesos de alfabetización limitada fue ineficaz. No hubo cambio en  HbA1%. Aunque una pérdida de peso estadísticamente significativa se observó a los siete meses, no era clínicamente abrumadora ni sostenida. El cumplimiento de las sesiones programadas era pobre, e incluso los sujetos del grupo control se observó cambios significativos en el peso. No se encontraron factores predictivos de peso o la mejora de la glucosa. Hay varias explicaciones posibles para estos resultados negativos. Los sujetos representaban una población mencionada, que incluyó muchos pacientes con diabetes de larga data que habían recibido previamente educación.	
  Riesgo de sesgo 		
Sesgo	Evaluación	Apoyo para la Evaluación	

Generación de la Secuencia aleatorizada	
No claro	Cita: ”randomly assigned in blocks of six
to one of three programs”
Comentario:  No  describe  el  proceso  de generación	
Ocultación de la asignación	No claro	Comentario: No describe	
Cegamiento de los participantes y del personal	
No claro	
Comentario: No describe	
Cegamiento de los evaluadores	No claro	Comentario: No describe	

Manejo de los datos de resultado incompletos	
Alto	Comentario: se presentan valores altos de pérdidas y no se mencionan como lo manejaron, posiblemente afectando los resultados	

Notificación selectiva de los resultados	

Alto	Cita:	“These	differences	were	not statistically significant either….” Comentario: se observan datos que están incompletos,  mencionan  las  diferencias pero no el numero ni en las tablas	


Multimedia versus written information for nocturnal enuresis education: a cluster randomized controlled trial. (Redsell/2003)	
Diseño de estudio	Estudio clínico aleatorizado en cluster	
Población	El  nivel  de  las  agrupaciones  era  clínicas  de  enuresis dirigidas enfermeras de la escuela.	
Lugar	Leicestershire, UK	


Tamaño de muestra (número de participantes)	n=270 niños 108=Intervención 1
87 = Intervención 2 75 = Grupo control	


Intervención	Intervención 1: Software multimedia (Este consistía en un sistema interactivo, multimedia CD-ROM titulado "Todo sobre enuresis nocturna", que proporciona información a los niños con enuresis (y sus padres)).
Intervención 2: folletos escritos	
Comparador	No se les dio ninguna información adicional específica	

Hipótesis de investigación	la hipótesis de que enseñar a un niño el proceso de su tratamiento “mojar la cama”, por ejemplo,  cómo  usar una alarma de zumbador que puedan participar activamente en su régimen de tratamiento	


Desenlaces	evaluados	y técnica de medición	Las medidas de resultados clínicos: si o no un niño permanece seco y se mantuvo seco 6 meses después de la ejecución
Las medidas de utilización de la asistencia sanitaria fueron el número de visitas fallidas y las tasas de abandono
Las medidas psicosociales fueron los siguientes:
Los padres completaron el cuestionario de tolerancia materna
niños completaron el impacto de 17 ítems de la escala de mojar la cama
Los niños también completaron la versión abreviada de 25 ítems de la Coopersmith (1967) Escala de autoestima.	

Resultados	30% grupo de folletos, 24% grupo de control, y 19,4% en el grupo intervención reportaron estar secos. (p=0,69)	
Tiempo de seguimiento	6 meses	
Pérdidas (%)	26%	
Fuente de financiación	Trent Region NHS Executive, UK, funded this study	


Conclusiones	No hubo diferencias  significativas entre  los grupos experimentales en relación con cualquiera de las medidas de resultado. Un número de explicaciones puede ser pertinente; primero la vía de la adquisición de conocimientos en la intención del comportamiento y luego a un cambio de comportamiento es probable que sea compleja como para los niños como para los adultos y los programas multimedia puede no tener suficiente poder para influir en los resultados. Sin embargo, se ha informado anteriormente mejorías en la auto-eficacia después de la participación en un programa educativo utilizando software multimedia. Nuestros hallazgos pueden ser únicos para el grupo de niños estudiados que pueden tener dificultades para cambiar su comportamiento relacionado con la salud	
  Riesgo de sesgo 		
Sesgo	Evaluación	Apoyo para la Evaluación	

Generación de la Secuencia aleatorizada	
No claro	Cita:  “randomly  allocated  to  one  of  the three conditions”
Comentario: No describen el proceso de generación aleatoria	
Ocultación de la asignación	No claro	Comentario: No describe	
Cegamiento de los participantes y del personal	
No claro	
Comentario: No describe	
Cegamiento de los evaluadores	No claro	Comentario: No describe	

Manejo de los datos de resultado incompletos	
Alto	Comentario: presentan valores altos de pérdidas y no se mencionan como lo manejaron, posiblemente afectando los resultados	
Notificación selectiva de los resultados	No claro	Comentario:	No	hubo	información suficiente	


Randomized controlled trial of a safer sex intervention for high-risk adolescent girls. (Shrier/2001)	
Diseño de estudio	Estudio clínico aleatorizado	
Población	adolescentes  con  cervicitis  o  la  enfermedad  pélvica inflamatoria	
Lugar	hospital-based adolescent clinic	
Tamaño de muestra (número de participantes)	n=123
Intervención (n=60) control (n=63)	


Intervención	Se inició con una cinta de vídeo de 7 minutos, sobre del uso del condón y enfermedades de transmisión sexual (SDT).	
Comparador	Educación estándar	
Hipótesis de investigación	No es claro		
Desenlaces	evaluados	y técnica de medición	Cuestionario auto-administrado: preguntas acerca de la vida sexual, conocimiento de riesgos sexuales, actitudes acerca del uso del condón…	


Resultados	En el 1 mes, en comparación con los controles, los participantes de intervención tuvieron mayores aumentos en el conocimiento del riesgo de SDT (P = .02) y actitudes positivas hacia los condones (p = 0,007) y fueron algo más propensos a reportar más frecuentes (P
= .08 ) y más consistente (P = .09) el uso del condón con una pareja no principal.	
Tiempo de seguimiento	12 meses		
Pérdidas (%)	En el mes 12 se presentaron en el grupo de intervención 53% y control 53%	
Fuente de financiación	This study was supported by the Children’s Hospital
Aerosmith Endowment Fund, Boston	


Conclusiones	Se encontró que al 1 mes, la intervención se asoció con un mayor conocimiento de los riesgos sexuales y mejores actitudes uso del condón. Los datos también sugieren un aumento en la frecuencia de uso del preservativo con una pareja no principal entre los participantes de la intervención, pero la diferencia con respecto a los controles no alcanzó significación estadística. Debido a que sólo 28 adolescentes (35%) que da seguimiento en 1 mes informaron un socio no principal en los 6 meses anteriores, el estudio tenía un poder limitado (35%) para detectar una diferencia significativa en el uso de preservativos entre los grupos	
  Riesgo de sesgo 		
Sesgo	Evaluación	Apoyo para la Evaluación	
Generación de la Secuencia aleatorizada	
No claro	Cita: “For participants randomized” Comentario: No describen el proceso de generación	
Ocultación de la asignación	No claro	Comentario: No describe	
Cegamiento de los participantes y del personal	
No claro	
Comentario: No describe	


Cegamiento de los evaluadores	No claro	Comentario: No describe	

Manejo de los datos de resultado incompletos	
Alto	Comentario: presentan valores altos de pérdidas y no se mencionan como lo manejaron, posiblemente afectando los resultados	
Notificación selectiva de los resultados	
Alto	Cita: “(data not shown)”
Comentario: no muestran todos los datos del estudio	


Training seniors in the operation of an automated external defibrillator: a randomized trial comparing two training methods. (Meischke/2001)	
Diseño de estudio	Estudio Clínico Controlado Aleatorizado	
Población	Líderes comunitarios (mayores de edad)	
Lugar	King County, Washington	
Tamaño de muestra (número de participantes)	n=210  (intervención  n=  54  pares  (108  pacientes)  / control n=51 pares (102 Pacientes)	
Intervención	Video de instrucción en el manejo de AED (Desfibrilador Automatizado Externo)	
Comparador	Instrucción cara a cara	

Hipótesis de investigación	La hipótesis de que habría diferencias no clínicamente significativas en el tiempo de choque (que se define como una diferencia de <1 minuto) y habilidades de operación AED entre los 2 grupos	


Desenlaces	evaluados	y técnica de medición	Se mantienen o potencializa el conocimiento del manejo del desfibrilador.
Se evaluó intervalos de 3 tiempo: inicio de la simulación hasta que el aprendiz abrió la máquina de AED (tiempo de reconocimiento), el tiempo de apertura de la máquina DEA hasta que el aprendiz entregó el primer choque (tiempo de funcionamiento), y el tiempo total (las primeras 2 veces combinados).	


Resultados	En la evaluación inicial de habilidades de  AED,”Shake and shout” tiene diferencia entre los grupos p<0,05, y después del seguimiento los ítems no tuvieron diferencias entre los grupos.
Con respecto a la evaluación de los intervalos se observa en el estudio la proporción de participantes y la diferencia entre los grupos en proporción y el IC del 95%.	


Tiempo de seguimiento	3 meses		
Pérdidas (%)	16%		

Fuente de financiación	Beca del Medic One Foundation y de Asmund S. Laerdal Foundation for Acute Medicine, Agilent Technologies, and Medtronic Physio-Control	


Conclusiones	La población puede ser entrenada con elementos similares y adecuada calidad independiente de la aplicación del método (virtual  o cara a cara).  Las habilidades del AED no dependen de la técnica de instrucción	
  Riesgo de sesgo 		
Sesgo	Evaluación	Apoyo para la Evaluación	

Generación de la Secuencia aleatorizada	
No claro	Cita:	“After	confirming	adequate randomization”
Comentario.  No  describe  el  proceso  de generación.	
Ocultación de la asignación	No claro	Comentario: No describe	
Cegamiento de los participantes y del personal	
No claro	
Comentario: No describe	
Cegamiento de los evaluadores	No claro	Comentario: No describe	
Manejo de los datos de resultado incompletos	Alto	Comentario: Presenta altas perdidas y no mencionan como fue el manejo	
Notificación selectiva de los resultados	No claro	Comentario:	No	hubo	información suficiente	


Innovative delivery of newborn anticipatory guidance: a randomized, controlled trial incorporating media-based learning into primary care. (Paradis/2011)	
Diseño de estudio	Estudio clínico controlado aleatorizado	
Población	Pacientes   y   familiares   que   asistieron   a   la   primera consulta después del nacimiento	
Lugar	Oficinas   pediátricas   de   la   University   of   Rochester Medical Center.	
Tamaño de muestra (número de participantes)	n= 137 (intervención n= 70 / control n= 67)	

Intervención	Video de 15 minutos producido localmente que representa los aspectos básicos de la atención del recién nacido	


Comparador	Material estándar escrito	


Hipótesis de investigación	El DVD de guía para el recién nacido prematuro puede ser una manera fácil de incorporar hábitos de cuidado entre los padres y los cuidadores, lo que puede aumentar el grado de conocimiento y mejorar la sensación de satisfacción y preparación de los padres.	


Desenlaces	evaluados	y técnica de medición	Conocimiento de los pacientes sobre el desarrollo de niños. (2 of these (knowledge and self-efficacy))
Auto eficacia en las habilidades de cuidado (Infant Care Self- Efficac)
Competencias para la resolución de problemas (How I Deal with Problems Regarding Care of My Baby Questionnaire)
Utilización de los servicios de salud (n° de visitas)	


Resultados	Las 3 medidas resolución de problemas, auto-eficacia, y el conocimiento eran altos al inicio del estudio en ambos grupos, no cambió significativamente durante el seguimiento, y no fueron diferentes entre los 2 grupos.
Solo después del seguimiento los aspectos en el grupo de DVD eran más propensos a reportar  el alto grado de confianza de bañar a su bebé (92,9% vs 77,6%, p = 0,01) y el reconocimiento de la congestión (70,0% vs 52,2%, p
= 0,03) en comparación con los padres del grupo de control.
En la utilización de los servicios, el grupo  de intervención tuvieron menos consultas profesionales (2,9 vs 4.0, p=0.04) y eran menos propensos a tener visitas de oficinas adicionales, más allá de su visita programada normalmente (39% vs 63%, p=0.01) entre el nacimiento y los 2 meses. Estos resultados fueron apoyados por análisis multivariados que controlaron las características demográficas y las diferencias iniciales entre los grupos, incluyendo el estado de la lactancia materna y el hospital de nacimiento. De hecho, los padres del grupo de control fueron 2,6 veces más propensos a tener más de 1 visita al consultorio adicional entre el nacimiento y los 2 meses en comparación con los padres del grupo de DVD (OR 2,6; IC del 95% 1.3 a 5.5)	
Tiempo de seguimiento	2 meses	
Pérdidas (%)	4%	


Fuente de financiación	The research for this article was funded by a Young Investigator Award from the Academic Pediatric Association and The Commonwealth Fund. National Clinical Trials Registry NCT00820677.	

Conclusiones	El DVD de guia para el recien nacido puede ser aceptado y tener un positivo impacto. Videos y otras tecnologías innovadoras pueden ser usadas para mejorar y lograr los mecanismos de comprensión	
  Riesgo de sesgo 		
Sesgo	Evaluación	Apoyo para la Evaluación	
Generación de la Secuencia aleatorizada	Bajo	Cita: “We used a random-numbers table
to generate the assignment”	
Ocultación de la asignación	No claro	Comentario: No describe	
Cegamiento de los participantes y del personal	
No claro	
Comentario: No describe	
Cegamiento de los evaluadores	
Bajo	Cita: “Outcomes were assessed by research associates who were blinded to group allocation.”	
Manejo de los datos de resultado incompletos	Bajo	Comentario:	Las	pérdidas	fueron equilibradas entre los grupos	
Notificación selectiva de los resultados	No claro	Comentario:	No	hubo	información suficiente	


Video telehealth for weight maintenance of African-American women. (Gerber/2013)	
Diseño de estudio	Estudio controlado aleatorizado	
Población	Mujeres afro americanas con sobrepeso y obesas de 35 a 65 años	
Lugar	Hogares / gimnasio	
Tamaño de muestra (número de participantes)	n=88 (intervención n=45 / control n=43)	

Intervención	Hogar telesalud: asesoramiento telefónico y de Internet en casa paraa habilitar grabadoras de video digital (DVR) con tres canales de programas de vídeo	

Comparador	Recibieron llamadas mensuales de asistencia telefónica durante la fase de mantenimiento de peso (promedio de duración de 10-12 minutos).	


Hipótesis de investigación	El mantenimiento de pérdida de peso sería mayor entre las mujeres en el grupo de intervención en comparación con el grupo control en la visita de seguimiento en el 9 meses.	


Desenlaces	evaluados	y técnica de medición	1. medir la efectividad del programa TELEHEALTH VIDEO para el mantenimiento del peso: frecuencia de consumo de alimentos (The Block Brief 2000 Food Frequency Questionnaire (FFQ)), evaluación de la actividad física (International Physical Activity Questionnaire (IPAQ)), apoyo social y auto-eficacia.	


Resultados	Las mujeres del grupo de intervención reportaron niveles más altos del fomento de alimentación saludable en la familia (12,0 vs. 9.6, p=0.02)
La media (SE) de cambio de peso fue de 0,1 kg (0,6) en el grupo de intervención y -0.2 (0,6) kg en el grupo de control (P = 0,69). Un análisis por intención de tratar utilizando el peso de referencia en lugar de los valores que faltan en la aleatorización o de seguimiento también arrojaron conclusiones similares: cambio medio de peso (SD) fue de 0,5 (3,7) kg en el grupo de intervención y -
0.1 kg (3.8) en el grupo de control (P = 0,47, n = 88).
Los cambios en el consumo de energía, grasas, grasas saturadas, fibra, frutas y verduras no difirieron significativamente entre los grupos.
El cambio actividad física moderada a vigorosa fue similar en los dos grupos (p = 0,49), pero los niveles moderados de actividad se mantienen mejor en el grupo de intervención que en el grupo control (media = 0,0 min
/ día vs. -3,6 min / día, P = 0,01). No hubo diferencias entre los grupos para cualquiera de apoyo social o escalas de auto-eficacia.	
Tiempo de seguimiento	9 meses		
Pérdidas (%)	1%		
Fuente de financiación	The  study  was  supported  by  NIH  grant  NIDDK  R21 DK078352.	


Conclusiones	No se observó una mejora en el mantenimiento del peso en el grupo de vídeo telesalud. Otros enfoques se han encontrado para tener éxito en la mejora de la pérdida de peso, y se necesitan estudios para identificar su papel en el mantenimiento del peso entre las mujeres afroamericanas	
  Riesgo de sesgo 		
Sesgo	Evaluación	Apoyo para la Evaluación	
Generación de la Secuencia aleatorizada	Bajo	Cita: “randomized to each group using a
software application”	


Ocultación de la asignación	No claro	Comentario: No describe	
Cegamiento de los participantes y del personal	
No claro	
Comentario: No describe	
Cegamiento de los evaluadores	No claro	Comentario: No describe	
Manejo de los datos de resultado incompletos	Bajo	Comentario:	utilizaron	métodos adecuados para el análisis y fueron pocos.	
Notificación selectiva de los resultados	No claro	Comentario:	No	hubo	información suficiente	


Internet-enabled interactive multimedia asthma education program: a randomized trial (Krishna/2003)	
Diseño de estudio	Ensayo clínico aleatorizado	
Población	Niños menores de 18 años con asma y sus cuidadores	
Lugar	Pediatric Pulmonary and Allergy Clinic de la Universidad de Missouri-Columbia	
Tamaño de muestra (número de participantes)	
N= 246. Grupo control n=127; intervención n=119	

Intervención	Educación usual + CD con material sobre asma: Interactive Multimedia Program for Asthma Control and Tracking (IMPACT) durante la consula	
Comparador	Educación verbal e impresa	
Hipótesis de investigación	No especifica	

Desenlaces  evaluados  y técnica de medición	Conocimiento, desenlaces en salud (días con síntomas, visitas a urgencias, hospitalizaciones), uso de recursos, evaluados con cuestionarios realizados a cuidadores y a niños.	


Resultados	Diferencia de medias entre grupos: Conocimiento en cuidadores de niños de 0 -6 años: 3.38, p<0.01; Conocimiento en cuidadores de niños de 7 - 17 años: 7.87, p<0.01; Conocimiento niños 7 – 17 años: 5.61, p<0.001; N° de días con síntomas de asma: 24,3 p<0.01; N° de visitas a emergencia: 0.5, p<0.05; dosis diaria de corticoesteroides: 320.37, p<0.01	
Tiempo de seguimiento	1 año 8 meses	
Pérdidas (%)	Total 7.3%: 6 (4.7%) de grupo control, 12 (10%) de la intervención	


Fuente de financiación	Subsidios de National Heart Lung and Blood Institute, Aetna Academic Medicine and Managed Care Forum (Schering Plough Corporation, Integrated Therapeutics Group), National Library of Medicine , y Hospital de niños de la Universidad de Missouri Columbia	

Conclusiones	Suplementar el cuidado convencional del asma con educación interactiva multimedia puede mejorar el conocimiento sobre asma y reducir la carga de la enfermedad en los niños.	
  Riesgo de sesgo 		
Sesgo	Evaluación	Apoyo para la Evaluación	
Generación de la Secuencia aleatorizada	
No claro	Participantes	fueron	asignados aleatoriamente a alguno de los dos grupos, no especifica método de aleatorización	
Ocultación de la Asignación	No claro	No menciona como ocultaron la asignación	
Cegamiento de los Participantes	y	del personal	
Bajo	Los médicos tratantes no sabían cuáles niños estaban participando y a qué manejo había sido asignado cada niño	
Cegamiento de los evaluadores	No claro	No  menciona  si  los  evaluadores  tuvieron cegamiento	
Manejo de los datos de resultado incompletos	Bajo	Análisis	por	intención	a	tratar,	pocas pérdidas, la mayoría en grupo control	
Notificación selectiva de los resultados	Bajo	Cumplieron objetivos y emplearon métodos pre-especificados	

Use of a DVD to provide dietary and lifestyle information to pregnant women who are overweight or obese: a nested randomised trial (Szmeja/2014)	
Diseño de estudio	Ensayo aleatorizado anidado	

Población	Mujeres con embarazo único entre 10 - 20 semanas de gestación  con  IMC  en  su  primer  control  prenatal  ≥25
kg/m2.   Pertenecían   al   estudio   LIMIT   donde   recibían asesoría de sobrepeso en embarazo	
Lugar	Consulta externa	
Tamaño de muestra (número de participantes)	
n =1108; 543 a DVD, 565 a grupo material standard	

Intervención	Material escrito standard + consultas + DVD: comida saludable, porciones, y ejercicio durante el embarazo. La información del DVD fue la misma presentada en consulta y material escrito.	
Comparador	Material escrito y consultas	


Hipótesis de investigación	No especifica		


Desenlaces  evaluados  y técnica de medición	Healthy Eating Index: calidad de la dieta; Actividad física: Short Questionnaire to Assess Health-enhancing physical activity (SQUASH), Peso total ganado (kg), Peso promedio ganado (kg); mejoría en conocimiento de alimentación saludable; mayor conocimiento de actividad física; mejoría de la salud durante el embarazo	


Resultados	La media de Healthy Eating Index fue mayor en el grupo de intervención a las 36 semanas de gestación (73.6 vs 72.3; diferencia de medias ajustada 1.2; 95% CI 0.2 - 2.3; p =
0.02), pero no a las 28 semanas de gestación (73.2 vs 73.5;
diferencia de medias ajustada −0.1; 95% CI −1.1 - 0.9; p = 0.82). Sin diferencia significativa en actividad física ni ganancia total de peso.	
Tiempo de seguimiento	36 semanas?		

Pérdidas (%)	Intervención:  39.2%  a  las  28  semanas,  42.9%  a  las  36
semanas. Control: 36.5% a las 28 semanas, 42% a las 36
semanas. Total: 42.5%	

Fuente de financiación	JMD recibe una beca del Australian National Health and Medical Research Council (NHMRC). LNY tiene una beca de NHMR. RMG tiene una beca de NHMRC	


Conclusiones	Proveer un DVD informativo se asoció con una mejoría en la calidad de la dieta a las 36 semanas de gestación, pero no se asoció con cambios en actividad física o ganancia de peso. La mayoría evaluó positivamente el material pero su uso fue pobre.	
  Riesgo de sesgo 		
Sesgo	Evaluación	Apoyo para la Evaluación	

Generación de la Secuencia aleatorizada	

Bajo	Se telefoneó al servicio central de aleatorización para obtener una secuencia aleatoria a través de un cronograma generado por computador con  bloques balanceado	
Ocultación de la asignación	Bajo	Uso de servicio telefónico	
Cegamiento de los participantes y del personal	
No claro	
No menciona cegamiento	
Cegamiento de los evaluadores	No claro	No menciona cegamiento	
Manejo de los datos de resultado incompletos	Bajo	Análisis por intención a tratar	
Notificación selectiva de los resultados	Bajo	Cumplen  objetivos  y  son  evaluados  de  la manera en la que se propone	


Multimedia education programme for patients with a stoma: effectiveness evaluation (Lo/2011)	
Diseño de estudio	Ensayo clínico aleatorizado	
Población	Pacientes de una unidad quirúrgica	
Lugar	Hospital en Taiwan	
Tamaño de muestra (número de participantes)	
n: 102; intervención: 46, control: 56	

Intervención	Programa de educación Multimedia sobre información del proceso de un estoma con videos y modelos para reforzar la información	
Comparador	Educación convencional con un folleto	
Hipótesis de investigación	No especifica		

Desenlaces  evaluados  y técnica de medición	Niveles de conocimiento en autocuidado con la Self-Care Knowledge Scale; actitudes sobre el autocuidado y comportamientos de autocuidado con Self-Care Attitudes Scale	

Resultados	Conocimiento de autocuidado mayor en grupo intervención (ANCOVA, F=6.92, p<0.001). Actitudes de autocuidado mayor en grupo intervención (ANCOVA, F=8.91, p<0.001).	
Tiempo de seguimiento	Una semana		
Pérdidas (%)	Intervención: 8%; Control: 1.7%. Pérdida total: 4.9%	
Fuente de financiación	Patrocinado  por  el  Buddhist  Tzu  Chi  General  Hospital, Hualien, Taiwan	


Conclusiones	Una intervención educacional que emplea una aproximación multimedia de forma temprana en el período posoperativo puede tener un efecto positivo en los niveles de conocimiento y promover actitudes y comportamientos de autocuidado	
  Riesgo de sesgo 		
Sesgo	Evaluación	Apoyo para la Evaluación	
Generación de la Secuencia aleatorizada	Bajo	Lista  de  números  aleatorios  generada  por computador	
Ocultación de la asignación	No claro	Se	ocultó	asignación	al	auxiliar	de investigación pero no especifica como	
Cegamiento de los participantes y del personal	
Bajo	
Cegamiento al auxiliar investigativo	
Cegamiento de los evaluadores	No claro	No se menciona	


Manejo de los datos de resultado incompletos	Alto	No   menciona   como   se   manejaron   datos incompletos	
Notificación selectiva de los resultados	Bajo	Reporta	resultados	según	objetivos propuestos	

Evaluation of a brief computer-mediated intervention to reduce HIV risk among early adolescent females (Di Noia/2004)	
Diseño de estudio	Ensayo clínico aleatorizado	
Población	Adolescentes de sexo femenino de 11 – 14 años de edad reclutadas a través de agencias de servicios sociales	
Lugar	New York		
Tamaño de muestra (número de participantes)	
n: 205		
Intervención	Keeping It Safe, programa PC con educación sobre VIH	
Comparador	Programas usuales	
Hipótesis de investigación	No especifica		
Desenlaces  evaluados  y técnica de medición	Conocimiento sobre VIH/SIDA, actitudes de protección y autoeficacia en reducción de riesgo para VIF; evaluado a través de cuestionarios	

Resultados	Medias marginales ajustadas revelaron que el brazo experimental tuvo mayor conocimiento posttest y auto- eficacia que el control (M = 8.18 vs. M = 6.87 and M = 13.29 vs. M = 12.72, respectivamente).	
Tiempo de seguimiento	4 semanas		
Pérdidas (%)	No menciona		
Fuente de financiación	No especifica		

Conclusiones	Las intervenciones mediadas por computador pueden mejorar el conocimiento sobre VIH/SIDA y reducir el riesgo temprano entre adolescentes de sexo femenino, sin embargo se necesita más investigación	
  Riesgo de sesgo 		
Sesgo	Evaluación	Apoyo para la Evaluación	
Generación de la Secuencia aleatorizada	
No claro	Aleatorización por bloques tomando como unidad sitio de atención, pero no especifica cómo se generó la secuencia	
Ocultación de la asignación	No claro	No se menciona en el estudio	
Cegamiento de los participantes y del personal	
No claro	
No se menciona en el estudio	


Cegamiento de los evaluadores	No claro	No se menciona en el estudio	
Manejo de los datos de resultado incompletos	No claro	No se menciona en el estudio	
Notificación selectiva de los resultados	Bajo	Se  cumplieron  objetivos  del  estudio  de  la forma en la que se propuso	


Assessment of the effect of combined multimedia and verbal information vs verbal information alone on anxiety levels before bond-up in adolescent orthodontic patients: a single-center randomized controlled trial (Srai/2013)	
Diseño de estudio	Ensayo clínico aleatorizado	
Población	Niños de 10 a 16 años que acudían a ortodoncia	
Lugar	Eastman   Dental   Hospital,   University   College   London Hospitals Foundation Trust, London, United Kingdom	
Tamaño de muestra (número de participantes)	
n:90; intervención: 45; control: 45	
Intervención	DVD que muestra procedimiento	
Comparador	Información verbal sobre el procedimiento	


Hipótesis de investigación	(1) Proveer información adicional por multimedia respecto al procedimiento de unión en ortodoncia no afecta el puntaje medio de ansiedad en pacientes adolescentes antes del procedimiento; y (2)  sexo, etnicidad, y edad no influencian la media del puntaje de ansiedad antes del procedimiento	
Desenlaces  evaluados  y técnica de medición	Ansiedad  evaluada  con  State-Trait  Anxiety  Inventory  for Children	
Resultados	Menor ansiedad en grupo de intervención, diferencia de medias de 2 con 95% IC 0.15-3.85 y p < 0.012	
Tiempo de seguimiento	1 año 1 mes	
Pérdidas (%)	Total: 5.5%  intervención: 6.6%; control: 4.4%	
Fuente de financiación	No especifica	

Conclusiones	Información adicional reduce los niveles de ansiedad pero otros métodos pueden ser más costo efectivos que un DVD. Sexo, etnicidad, y edad no afectaron los niveles de ansiedad.	
  Riesgo de sesgo 		
Sesgo	Evaluación	Apoyo para la Evaluación	
Generación de la Secuencia aleatorizada	
Bajo	Se aleatorizaron en grupos de a 10 a cada uno de los brazos usando una tabla de números aleatorios	


Ocultación de la asignación	
Bajo	Se asignaron números impares al control y pares a intervención. Se ocultó asignación usando sobres opacos.	
Cegamiento de los participantes y del personal	
Bajo	El  personal  no  tenía  conocimiento  de  la asignación de los participantes	
Cegamiento de los evaluadores	
Bajo	Los investigadores permanecieron con el cegamiento hasta recolectar puntajes de los cuestionarios	
Manejo de los datos de resultado incompletos	Bajo	Análisis por protocolo, pocas pérdidas	
Notificación selectiva de los resultados	Bajo	Reportan	resultados	de	acuerdo	con métodos y objetivos planteados	


Multimedia approach to preoperative adenotonsillectomy counseling (Adams/2015)	
Diseño de estudio	Ensayo clínico aleatorizado	
Población	Padres/guardianes	de	niños	que	serían	llevados	a adenotonsilectomía	
Lugar	Madigan Army Medical Center	
Tamaño de muestra (número de participantes)	
n:45	
Intervención	Asesoría con vídeo	
Comparador	Asesoría con folleto y sólo asesoría verbal	
Hipótesis de investigación	No especifica	
Desenlaces  evaluados  y técnica de medición	Identifying	9	associated	risks	of	adenotonsillectomy: cuestionario adaptado	


Resultados	Los pacientes identificaron 6.8 riesgos (95% IC 6.2-7.3) en el grupo de asesoría, 7.3 (95% CI, 6.4-8.3) en el grupo de asesoría y folleto, y 6.6 (95% CI, 5.9-7.3) en el grupo de vídeo y asesoría; no hubo diferencia significativa entre grupos (P = .32)	
Tiempo de seguimiento	No especifica	
Pérdidas (%)	No especifica	
Fuente de financiación	Ninguna	


Conclusiones	No hubo diferencia en la identificación de riesgos asociados a la adenotonsilectomía entre diferentes modalidades de asesoría. Los participantes retuvieron más información cuando hubo menos tiempo entre la asesoría preoperatoria y el día de la cirugía.	
  Riesgo de sesgo 		


Sesgo	Evaluación	Apoyo para la Evaluación	
Generación de la Secuencia aleatorizada	No claro	No especifica cómo se generó la secuencia	
Ocultación de la asignación	No claro	No se menciona en el estudio	
Cegamiento de los participantes y del personal	
No claro	
No se menciona en el estudio	
Cegamiento de los evaluadores	No claro	No se menciona en el estudio	
Manejo de los datos de resultado incompletos	No claro	No se menciona en el estudio	
Notificación selectiva de los resultados	Bajo	Reportan   resultados   de   acuerdo   con   los objetivos y metodología planteados	


Improving self-care for heart failure for seniors: the impact of video and written education and decision aids (Veroff/2012)	
Diseño de estudio	Ensayo clínico aleatorizado	
Población	Individuos  con  falla  cardíaca  en  un  plan  privado  de Medicare	
Lugar	No especifica	
Tamaño de muestra (número de participantes)	
n: 2349	

Intervención	Información básica sobre el programa y una hoja de hechos sobre falla cardíaca, con el DVD y el folleto Living with Heart Failure	
Comparador	Material básico en formato escrito	
Hipótesis de investigación	No especifica	
Desenlaces  evaluados  y técnica de medición	Preguntas del SF-12 Health Survey, y preguntas sobre síntomas de falla cardíaca, interacciones con el proveedor y conductas de autocuidado en cuestionarios	


Resultados	Los participantes del grupo de intervención eran más propensos a pesarse a diario (P=0.05) que el grupo control (44% versus 38%). Los participantes del grupo de intervención eran más propensos a monitorear su ingesta de líquidos (47% versus 44%) y a seguir una dieta baja en sodio (83% versus 77%)	
Tiempo de seguimiento	4 semanas; 2 tiempos en un período de 10 meses	
Pérdidas (%)	Total: 79%; intervención: 78.9% , control: 81.5%	
Fuente de financiación	No especifica	


Conclusiones	El apoyo del DVD aumento niveles de monitoreo de peso a diario y otras conductas importantes. Una mayor aplicación de intervenciones poco costosas para cambiar conductas, como un programa de DVD/follero, podrían ayudar a facilitar conductas importantes rutinarias en auto-cuidado para personas con falla cardíaca	
  Riesgo de sesgo 		
Sesgo	Evaluación	Apoyo para la Evaluación	
Generación de la Secuencia aleatorizada	No claro	No especifica cómo se generó la secuencia	
Ocultación de la asignación	No claro	No se menciona en el estudio	
Cegamiento de los participantes y del personal	
No claro	
No se menciona en el estudio	
Cegamiento de los evaluadores	No claro	No se menciona en el estudio	
Manejo de los datos de resultado incompletos	No claro	No se menciona en el estudio	
Notificación selectiva de los resultados	Bajo	Reportan   resultados   de   acuerdo   con   los objetivos y metodología planteados	


The effectiveness of an accessibility-enhanced multimedia informational educational programme in reducing anxiety and increasing satisfaction of patients undergoing cardiac catheterisation (Wu/2014)	
Diseño de estudio	Experimental aleatorizado	
Población	Pacientes   adultos   admitidos   a   un   centro   médico   y programados para su primera cateterización cardíaca	
Lugar	Centro médico en Taipei	
Tamaño de muestra (número de participantes)	
n:135; Grupo 1:46, Grupo 2: 43 Grupo 3: 46	
Intervención	Información educativa en multimedia	
Comparador	Vídeodisco educativo y educación usual	
Hipótesis de investigación	No especifica	


Desenlaces  evaluados  y técnica de medición	Ansiedad medida con Inventario de Ansiedad de Spielberger en cuatro intervalos: antes de intervención educativa (T0), inmediatamente después de intervención educativa (T1), antes de cateterización cardíaca (T2) y después de cateterización cardíaca (T3). Cuestionario de satisfacción tipo Likert	


Resultados	Hubo una mayor reducción de ansiedad en grupo de intervención comparado con pacientes en educación usual (diferencia de 16.33 puntos), y con el grupo de DVD (diferencia de 13.25 puntos). Únicamente la diferencia en tiempo T2 fue significativa (p= 0.004)	
Tiempo de seguimiento	1 año 4 meses	
Pérdidas (%)	Total: 4.1%; Grupo 1: 4.3%, Grupo 2: 4.6%, Grupo 3: 4.3%	
Fuente de financiación	No especifica		


Conclusiones	La educación a través de multimedia fue la más efectiva para informar pacientes sobre su cateterización cardíaca, para reducir ansiedad y mejorar la satisfacción con la información y los materiales recibidos comparados con la educación regular y la educación a través de videodisco	
  Riesgo de sesgo 		
Sesgo	Evaluación	Apoyo para la Evaluación	
Generación de la Secuencia aleatorizada	Bajo	Asignados mediante sorteo	
Ocultación de la asignación	No claro	No se menciona en el estudio	
Cegamiento de los participantes y del personal	
No claro	
No se menciona en el estudio	
Cegamiento de los evaluadores	No claro	No se menciona en el estudio	
Manejo de los datos de resultado incompletos	No claro	No se menciona en el estudio	
Notificación selectiva de los resultados	Bajo	Reportan   resultados   de   acuerdo   con   los objetivos y metodología planteados	


Improving communication when seeking informed consent: a randomised controlled study of a computer-based method for providing information to prospective clinical trial participants. (Karunaratne /2010)	
Diseño de estudio	Experimental aleatorizado	
Población	Pacientes con Diabetes mellitus de 27 a 70 años de edad	

Lugar	Departmento de Diabetes y Endocrinología en el Hospital Alfred y el Baker IDI Heart e Instituto Diabetes Institute, Melbourne.	
Tamaño de muestra (número de participantes)	
n: 60. Intervención: 30, control: 30	
Intervención	Presentación en computador	
Comparador	Información en papel	


Hipótesis de investigación	No especifica		
Desenlaces  evaluados  y técnica de medición	Comprensión  de  la  información  evaluada  por  métodos cualitativos y cuantitativos	


Resultados	Los puntajes que medían nivel de entendimiento fueron significativamente más altos en el grupo intervención que en el comparador (82% v 73%; P=0.005). Más participantes en el grupo intervención expresaron su interés de participar en el estudio falso (23 v 17; P=0.01).	
Tiempo de seguimiento	1 año 2 meses	
Pérdidas (%)	No tuvo pérdidas	
Fuente de financiación	No especifica		


Conclusiones	Proveer información a través de un método basado en computador puede ayudar a superar las deficiencias existentes en comunicación sobre investigación clínica y puede reducir costos y mejorar eficiencia al reclutar participantes para ensayos clínicos	
  Riesgo de sesgo 		
Sesgo	Evaluación	Apoyo para la Evaluación	
Generación de la Secuencia aleatorizada	No claro	Aleatorizados en bloques de 10, no especifica cómo se generó la secuencia	
Ocultación de la asignación	No claro	No se menciona en el estudio	
Cegamiento de los participantes y del personal	
Alto	
No hubo cegamiento en el estudio	
Cegamiento de los evaluadores	Alto	No hubo cegamiento en el estudio	
Manejo de los datos de resultado incompletos	Bajo	No hubo pérdidas en el estudio	
Notificación selectiva de los resultados	Bajo	Reportan   resultados   de   acuerdo   con   los objetivos y metodología planteados	


Reach and effectiveness of DVD and in-person diabetes self-management education (Glasgow/2009)	
Diseño de estudio	Diseño híbrido: preferencias y experimento aleatorizado	

Población	Miembros del plan de salud Kaiser Permanente Colorado mayores de 18 años de edad diagnosticados con Diabetes tipo 2	
Lugar	Ambulatorio	


Tamaño de muestra (número de participantes)	
n: 81		
Intervención	DVD		
Comparador	Clases		
Hipótesis de investigación	No especifica		


Desenlaces  evaluados  y técnica de medición	Efectividad evaluada por medidas de auto-reporte de conductas de autocuidado, y medidas biológicas. Auto- cuidado evaluado por alimentación saludable, ejercicio regular y glicemia. Adherencia evaluada con Hill-Bone Compliance Scale. Medidas biológicas de factores de riesgo se obtuvieron de información en historias clínicas sobre HbA1C, LDL colesterol y presión arterial	


Resultados	Diferencia DVD vs clase: Días de alimentación saludable -
0.4 vs -0.4; días de actividad física 0.2 vs -0.1; adherencia a medicamento 0.0 vs 0.2 (p<0.05); glucometría 0.1 vs 0.1; angustia por diabetes -0.1 vs -0.2; activación paciente -
0.0 vs 0.1; auto-eficacia -0.0 vs 0.2; resolución de problemas -0.1 vs -0.1; HbA1C -0.1 vs 0.0; LDL -0.0 vs - 13.3; presión arterial sistólica -3.1 vs 0.9	
Tiempo de seguimiento	6 meses		
Pérdidas (%)	Total: 78.1%		
Fuente de financiación	Proyecto  financiado  por  Kaiser  Permanente  Colorado. DVD producido por Visible Productions, Inc.	


Conclusiones	En general, a los 6 meses de seguimiento el DVD no produjo resultados significativamente diferentes que los de la clase, pero clase combinada con DVD no mejoró desenlaces más allá que los que produjo la clase sola. Este diseño híbrido se recomienda para dar estimaciones del alcance de un programa	
  Riesgo de sesgo 		
Sesgo	Evaluación	Apoyo para la Evaluación	
Generación de la Secuencia aleatorizada	No claro	No menciona como se generó la secuencia aleatoria	
Ocultación de la Asignación	No claro	No se menciona en el estudio	
Cegamiento de los participantes y del personal	
Alto	
No hubo cegamiento	
Cegamiento de los evaluadores	Alto	No hubo cegamiento	


Manejo de los datos de resultado incompletos	
Bajo	Análisis por intención a tratar y los datos perdidos al seguimiento se reemplazaron con el último valor presente en la variable dependiente relevante	
Notificación selectiva de los resultados	Bajo	Reportan   resultados   de   acuerdo   con   los objetivos y metodología planteados	


Educating adolescents about acne vulgaris: a comparison of written handouts with audiovisual computerized presentations. (Koch/2008)	
Diseño de estudio	Ensayo clínico aleatorizado	
Población	Adolescentes de 13 a 17 años	
Lugar	Un consultorio de dermatología privado o 1 de 3 clínicas pediátricas en New Haven	
Tamaño de muestra (número de participantes)	
n:80; intervención 35, control 45	
Intervención	Presentación computarizada	
Comparador	Folleto	


Hipótesis de investigación	Los sujetos aleatorizados a recibir presentaciones audiovisuales computarizadas sobre acne vulgaris demostrarán un mayor aumento en conocimiento sobre acne, medido con puntaje de cuestionario post- intervención y un mes después, cuando se comparan con sujetos recibiendo folletos	
Desenlaces  evaluados  y técnica de medición	Conocimiento sobre acné evaluado con cuestionario	


Resultados	Sin diferencia significativa en conocimiento entre grupos un mes después: (media, [SD]), presentación computarizada 17.14% (16.74%) vs folleto 12.84% (19.27%) (p=0.30); tampoco sin diferencia en la aplicación inmediata:    22.06%    [18.05%]    vs    26.91%    [15.93%]
(p=0.21). Mejoría significativa al interior de los grupos, no entre ellos.	
Tiempo de seguimiento	1 mes	
Pérdidas (%)	Totales: 3.75%	


Fuente de financiación	Este estudio fue financiado en parte por el subsidio MO1- RR06022 del Children’s  Clinical Research Center; el programa General Clinical Research Centers , Yale University Office of Student Research; the National Center for Research Resources, National Institutes of  Health;  y una beca en investigación de la Doris Duke Charitable Foundation	


Conclusiones	Tanto folletos como presentaciones audiovisuales sobre acné vulgaris confieren beneficios significativos en términos de ganancia de conocimiento a corto y largo plazo en adolescentes con acné	
  Riesgo de sesgo 		
Sesgo	Evaluación	Apoyo para la Evaluación	
Generación de la Secuencia aleatorizada	Bajo	Aleatorizados con lanzamiento de moneda	
Ocultación de la asignación	No claro	No se menciona en el estudio	
Cegamiento de los participantes y del personal	
Alto	
No se hizo cegamiento	
Cegamiento de los evaluadores	Alto	No se hizo cegamiento	
Manejo de los datos de resultado incompletos	No claro	No   menciona   como   se   manejaron   datos perdidos, pero las pérdidas fueron mínimas	
Notificación selectiva de los resultados	Bajo	Reportan   resultados   de   acuerdo   con   los objetivos y metodología planteados	


Multimedia  patient  education  to  assist  the  informed  consent  process  for  knee arthroscopy (Cornoiu/2011)	
Diseño de estudio	Ensayo clínico aleatorizado controlado	
Población	Pacientes en lista de espera para cirugía artroscópica de rodilla	
Lugar	Pre-admisión de la clínica	
Tamaño de muestra (número de participantes)	
n: 61; MM: 22, Verbal: 18, Panfleto: 21	
Intervención	Módulo de educación multimedia	
Comparador	Verbal o Panfleto	
Hipótesis de investigación	No especifica	
Desenlaces  evaluados  y técnica de medición	Recordación de información presentada antes de la cirugía, evaluado por cuestionario en diferentes momentos del peri-operatorio	


Resultados	En todos los momentos, el grupo multimedia (MM) respondió un mayor número de preguntas de forma correcta (p<0.05). Estadio 1: MM (98+/-5%), verbal (88+/- 14%) y panfleto (76+/-28%). El grupo MM (6.6+/-1.5) y el grupo verbal (5.8+/-2.2) demostraron una mayor satisfacción, que el de panfleto (3.9+/-1.8) (P < 0.05). Sin diferencia en niveles de ansiedad	
Tiempo de seguimiento	No especifica; tiempo promedio hasta el día de cirugía 30 días para MM, 23 para verbal y 18 para panfleto	
Pérdidas (%)	No especifica		
Fuente de financiación	No especifica		

Conclusiones	MM es una herramienta efectiva para ayudar en la provisión y retención de información durante el proceso de consentimiento informado.	
  Riesgo de sesgo 		
Sesgo	Evaluación	Apoyo para la Evaluación	
Generación de la Secuencia aleatorizada	Bajo	Aleatorizados con pelotas numeradas	
Ocultación de la asignación	No claro	No menciona como se hizo	
Cegamiento de los participantes y del personal	
Alto	
No hubo cegamiento	
Cegamiento de los evaluadores	Alto	No hubo cegamiento	
Manejo de los datos de resultado incompletos	
No claro	No se menciona manejo de resultados incompletos, pero tampoco se  menciona si hubo resultados incompletos	
Notificación selectiva de los resultados	Bajo	Reportan   resultados   de   acuerdo   con   los objetivos y metodología planteados	


The effectiveness of multimedia learning education programs on knowledge, anxiety and pressure garment compliance in patients undergoing burns rehabilitation in Taiwan: an experimental study (Lo/2010)	
Diseño de estudio	Estudio experimental controlado, con cegamiento simple	
Población	Pacientes del pabellón de rehabilitación de quemados	
Lugar	Unidad de quemados de un centro médico en Taiwan	
Tamaño de muestra (número de participantes)	
n: 64, intervención 32, control 32	
Intervención	MLEP: programa de educación y aprendizaje multimedia	
Comparador	Folleto de educación standard	


Hipótesis de investigación	Pacientes quemados que se encuentran en rehabilitación recibiendo MLEP reportarán mayor conocimiento, menos ansiedad y adecuada adherencia  al traje de  compresión que aquellos que reciben el folleto	
Desenlaces  evaluados  y técnica de medición	Conocimiento, ansiedad y adherencia al uso de traje de compresión medido con escalas: KBRS, APS y PGCBS	


Resultados	ANCOVAR para medir efectividad: Excluyendo influencia de edad y niveles de base para cada medición, hubo diferencias significativas para ambos grupos en conocimiento (F(1-54) =9.05, p =0.04, g =0.14), ansiedad
(F(1.54) =8.06, p =0.05, g =0.23), y adherencia (F(1.54)
=4.20, p =0.045, g =0.072)	
Tiempo de seguimiento	2 semanas		
Pérdidas (%)	Total: 9.3%; intervención: 12.5%, control: 6.25%	
Fuente de financiación	No especifica		


Conclusiones	A dos semanas, los resultados de este estudio mostraron que MLEP había mejorado de forma significativa el conocimiento sobre quemaduras de los pacientes, reducido ansiedad individual y aumentado la adherencia al traje de compresión	
  Riesgo de sesgo 		
Sesgo	Evaluación	Apoyo para la Evaluación	
Generación de la Secuencia aleatorizada	No claro	No	menciona	como	se	obtuvo	la aleatorización	
Ocultación de la asignación	No claro	No se menciona el proceso en el estudio	
Cegamiento de los participantes y del personal	
No claro	
Ciego simple, no especifica cómo se hizo	
Cegamiento de los evaluadores	No claro	Ciego simple, no especifica cómo se hizo	
Manejo de los datos de resultado incompletos	
Alto	No mencionan como manejaron datos incompletos, hubo pérdida de  seguimiento de forma diferencial entre grupos	
Notificación selectiva de los resultados	Bajo	Reportan   resultados   de   acuerdo   con   los objetivos y metodología planteados	


A  community-based  randomised  controlled  trial  of  three  different  educational resources for men about prostate cancer screening. (Gattellari/2005)	
Diseño de estudio	Ensayo clínico aleatorizado	
Población	Hombres de 50 a 70 sin historia de cáncer de próstata	
Lugar	Ambulatorio	


Tamaño de muestra (número de participantes)	
n: 421; folleto 140, video 141, booklet 140	
Intervención	Video		
Comparador	Follleto o booklet	
Hipótesis de investigación	No especifica		


Desenlaces  evaluados  y técnica de medición	Conocimiento: 10 preguntas verdadero/falso; visión de los hombres sobre el tamizaje de PSA :10 declaraciones de tipo actitudinal; Conflicto decisional (medido sólo post- test):Dos subescalas de la escala de conflicto decisional de O’Connor; preocupación sobre cáncer de próstata: usando una escala de 5 puntos tipo LIKERT; habilidad percibida de tomar una decisión informada sobre tamizaje de PSA; propensidad de tomar un tamizaje de PSA en los próximos 12 meses; probabilidad de aceptar la recomendación de un médico de ir a tamizaje (medido sólo post-test); evaluación basada en el escenario de que tan apropiado son dos aproximaciones diferentes al tamizaje de PSA en el consultorio; percepciones de los hombres respecto a la responsabilidad del médico general en ñas consecuencias adversas de las decisiones sobre tamizaje	


Resultados	Conocimiento (media, IC): Folleto 42.2 (39.4–45.0), video 45.8  (42.7–48.8),  booklet  57.2  (53.5–60.8),  F(2,402)  =
23.34; P < 0.001. Visión: Folleto 1.7 (1.6–1.9), video 1.7
(1.5–1.8), booklet 1.3 (1.1–1.5), F(2,402) = 6.41; P = 0.002.
Factores contribuyendo a incertidumbre  decisional: Folleto 6.6 (6.3–6.8), video 6.4 (6.2–6.6), booklet 6.1 (5.9– 6.4), F(2,402) = 3.30; P = 0.038. Menos de la mitad de los que recibieron booklet (n = 65, 49.6%) muy posiblemente estarían de acuerdo con la recomendación de un médico sobre tamizaje de PSA comparado con 63.2%(n=86) del folleto y 65.2%(n=90) del video, p<0.05	
Tiempo de seguimiento	21 días		
Pérdidas (%)	Total: 3.8%; folleto: 2.8%, video: 2.1%, booklet: 6.4%	
Fuente de financiación	No especifica		

Conclusiones	Los hombres requieren información detallada sobre los pros y los  contras del  tamizaje de PSA para tomar una decisión informada. Los recursos no son equivalentes para obtener este objetivo	
  Riesgo de sesgo 		
Sesgo	Evaluación	Apoyo para la Evaluación	


Generación de la Secuencia aleatorizada	
Bajo	Cada paciente tenía un código al momento de ingresar al estudio, se hizo aleatorización en bloques de estos códigos a través de un software	


Ocultación de la asignación	


Bajo	Asegurada pues los  entrevistadores encargados de reclutar a los pacientes estaban cegados  al diseño aleatorizado mientras que uno de los autores se encargaba de la aleatorización. Ni los participantes ni los entrevistadores estaban al tanto de la secuencia de aleatorización	


Cegamiento de los participantes y del personal	


Bajo	Los participantes no tenían conocimiento de la información que iban a recibir y no se les informó que se estaba probando tres tipos de formato. En post-test no era posible mantener el cegamiento respecto a qué grupo había sido aleatorizado cada paciente pues debían constatar que habían revisado el material	
Cegamiento de los evaluadores	Bajo	Evaluadores estuvieron cegados hasta tener resultados de los cuestionarios.	
Manejo de los datos de resultado incompletos	Bajo	Análisis por intención a tratar	
Notificación selectiva de los resultados	Bajo	Reportan   resultados   de   acuerdo   con   los objetivos y metodología planteados	


Comparison of effects of a self management booklet and audiocassette for patients with asthma (Jenkinson/1988)	
Diseño de estudio	Ensayo clínico aleatorizado	
Población	Pacientes asmáticos de 3 a 49 años de edad	
Lugar	Ocho consultorios	
Tamaño de muestra (número de participantes)	
n: 206	
Intervención	Libro + casete	
Comparador	Sólo libro, sólo casete, o ninguno	
Hipótesis de investigación	No especifica	

Desenlaces  evaluados  y técnica de medición	Conocimiento del uso de medicación, percepción de su discapacidad, habilidad de usar un inhalador, consumo de medicamentos, consultas a su médico, morbilidad y uso de material educativo evaluado a través de cuestionarios y un diario	


Resultados	Conocimiento, cambio en la media un año después de la intervención: Control -5, libro 4, casete 11, libro y casete 13; comparado con grupo control p=0.007	
Tiempo de seguimiento	18 meses		
Pérdidas (%)	14%		
Fuente de financiación	No especifica		


Conclusiones	Los pacientes con asma pueden obtener información útil de este material. El resultado paradójico donde los pacientes aprendieron más del casete pero prefirieron el libro sugiere que esta distinción puede hacerse entre la información que los pacientes necesitan, la cual puede adquirirse mejor de un audiocasete, y la información que ellos la quieren, la cual puede provenir de un libro. Aquellos con audiocasete y libro, prefirieron el libro	
  Riesgo de sesgo 		
Sesgo	Evaluación	Apoyo para la Evaluación	
Generación de la Secuencia aleatorizada	No claro	No mencionan generación de la secuencia	
Ocultación de la asignación	No claro	No se menciona en el estudio	
Cegamiento de los participantes y del personal	
Alto	
No hubo cegamiento	
Cegamiento de los evaluadores	Alto	No hubo cegamiento	

Manejo de los datos de resultado incompletos	
Alto	Retiraron algunos pacientes de uno de los análisis porque no tomaban medicación; varias pérdidas y no mencionan como se manejó en el análisis	
Notificación selectiva de los resultados	Bajo	Reportan   resultados   de   acuerdo   con   los objetivos y metodología planteados	


Randomized   trial   of   a   video-based   patient   decision   aid   for   bariatric   surgery (Arterburn/2011)	
Diseño de estudio	Ensayo clínico aleatorizado	
Población	Pacientes  de  20  a  65  años  con  candidatos  a  cirugía bariátrica	
Lugar	Group  Health  Cooperative,  un  plan  de  salud  en  King County, Washington	
Tamaño de muestra (número de participantes)	
n: 152, intervención: 75, control: 77	
Intervención	Video	


Comparador	Folleto educativo del NIH sobre cirugía bariátrica	
Hipótesis de investigación	No especifica		
Desenlaces  evaluados  y técnica de medición	Conocimiento	de	cirugía	bariátrica:	cuestionario;; preferencia en tratamiento: pregunta abierta	


Resultados	Conocimiento:   seguimiento   a   3   años,   porcentaje   de respuestas correctas: folleto 11% vs video 28% p=0.03 Conflicto decisional, media (IC) Escala 0-100: Folleto −11.8 (−16.9, −6.7) vs video −20.0 (−24.4, −15.6) p=0.03
Expectativa en desenlaces, media (IC) Escala 0-100: Folleto
1.4 (−0.3, 3.0) vs video −3.6 (−5.9, −1.2) p=0.001	
Tiempo de seguimiento	3 meses		
Pérdidas (%)	Total: 4.6%; intervención: 4%, control: 5.1%	
Fuente de financiación	Donación de la Foundation for Informed Medical Decision Making Inc.	


Conclusiones	El uso de “decision aids” en cirugía bariátrica se asoció con una mejoría en la calidad de las decisiones y reducción en la incertidumbre sobre el tratamiento a 3 meses. El video tuvo un mayor impacto que el folleto en el conocimiento de los pacientes, conflicto decisional y expectativas del desenlace	
  Riesgo de sesgo 		
Sesgo	Evaluación	Apoyo para la Evaluación	
Generación de la Secuencia aleatorizada	Bajo	Aleatorizados  por  bloques  a  través  de  un software	
Ocultación de la asignación	No claro	No mencionan como se efectuó	
Cegamiento de los participantes y del personal	
Alto	
No hubo cegamiento	
Cegamiento de los evaluadores	Alto	No hubo cegamiento	
Manejo de los datos de resultado incompletos	Bajo	No explicaron manejo de datos incompletos, pero las pérdidas fueron pocas	
Notificación selectiva de los resultados	Bajo	Reportan   resultados   de   acuerdo   con   los objetivos y metodología planteados	


Educating young children about asthma: comparing the effectiveness of a developmentally appropriate asthma education video tape and picture book (Holzheimer/1998)	
Diseño de estudio	Ensayo clínico aleatorizado	


Población	Niños de 2  - 5 años que requerían medicación diaria para asma	
Lugar	Ambulatorio		
Tamaño de muestra (número de participantes)	
n:80		
Intervención	Video		
Comparador	Video + libro, o libro, o video sin información sobre asma	
Hipótesis de investigación	No especifica		
Desenlaces  evaluados  y técnica de medición	Conocimiento sobre asma: cuestionario; estado de salud: diario	

Resultados	Comparación de mejoría en medias de los puntajes: vídeo
+ libro vs control F=14.062 p=0.001; video vs control f=4.143 p=0.049; libro vs control F=4.493 p=0.032; video + libro vs video F=4.723 p=0.036	
Tiempo de seguimiento	No especifica		
Pérdidas (%)	No especifica		
Fuente de financiación	Financiado por The Asthma Foundation of Queensland	
Conclusiones	Mejoró  adherencia  y  conocimiento  general  en  los  tres grupos de intervención	
  Riesgo de sesgo 		
Sesgo	Evaluación	Apoyo para la Evaluación	
Generación de la Secuencia aleatorizada	No claro	No mencionan generación de la secuencia	
Ocultación de la asignación	No claro	No se menciona en el estudio	
Cegamiento de los participantes y del personal	
Alto	
No hubo cegamiento	
Cegamiento de los evaluadores	Alto	No hubo cegamiento	
Manejo de los datos de resultado incompletos	No claro	No menciona manejo de datos perdidos ni pérdidas en el estudio	
Notificación selectiva de los resultados	Alto	No todos los resultados son reportados	


The  effect  of  primary  care  interventions  on  children's  media  viewing  habits  and exposure to violence. (Neely/2003)	
Diseño de estudio	Ensayo clínico aleatorizado	
Población	Padres de niños de 2 a 12 años de edad	


Lugar	Unidad de cuidado pediátrico primario	
Tamaño de muestra (número de participantes)	
n: 439. Video: 108, folleto: 115, Control:220	

Intervención	Dos grupos de intervención; uno vió 5 minutos del programa Play Nicely y otro recibióun folleto: "Pulling the Plug on TV Violence."	

Comparador	Dos grupos control; el grupo control primario con cuidado primario standard, otro con un programa sobre prevención de la obesidad	
Hipótesis de investigación	No especifica		
Desenlaces  evaluados  y técnica de medición	Reporte de los cambios que hicieron los padres en casa respecto a los hábitos de uso de medios y su exposición a violencia	


Resultados	Comparado con el grupo control primario, los padres con la intervención del video fueron más propensos areportar un cambio en los hábitos de sus hijos (odds ratio [OR] 3.29; 95% [CI] 1.66–6.51) y un cambio en su exposición a violencia (OR 4.26; 95% CI 1.95–9.27). Comparado con el control primario, los padres en el grupo de folleto fueron más propensos a cambiar los hábitos de sus hijos (OR 4.35; 95% CI 2.20–8.60) y un cambio en su exposición a violencia (OR 3.35; 95% CI 1.52–7.35).	
Tiempo de seguimiento	4 semanas		
Pérdidas (%)	Total: 28.9%		

Fuente de financiación	Apoyo del Scholarly Activities Fund, Division of General Pediatrics, Monroe Carell Jr Children’s Hospital, en Vanderbilt.	


Conclusiones	Las breves intervenciones de cuidado primario pueden afectar los hábitos televisivos de los niños y su exposición a violencia. Estos resultados tienen implicaciones en como los servicios de cuidado primario pueden relacionarse con la disminución de la exposición de los niños a la violencia en los medios y la prevención de la violencia.	
  Riesgo de sesgo 		
Sesgo	Evaluación	Apoyo para la Evaluación	
Generación de la Secuencia aleatorizada	No claro	No  menciona  generación  de  la  secuencia aleatoria	
Ocultación de la asignación	Bajo	Asignación se hizo con sobres opacos	


Cegamiento de los participantes y del personal	
Bajo	Cegamiento de la encargada de hacer el reclutamiento. Encargado de revisar las respuestas de los padres no conocía la asignación	
Cegamiento de los evaluadores	Alto	No hubo cegamiento de evaluadores	
Manejo de los datos de resultado incompletos	Alto	No se reporta manejo de datos incompletos a pesar de que tuvieron varias pérdidas	
Notificación selectiva de los resultados	Bajo	Reportan   resultados   de   acuerdo   con   los objetivos y metodología planteados	


"Teens Talk Healthy Weight": the impact of a motivational digital video disc on parental knowledge of obesity-related diseases in an adolescent clinic (Windham/2014)	
Diseño de estudio	Ensayo clínico aleatorizado	

Población	Adolescentes que fueron remitidos por primera vez a control de peso y acudieron a una primera cita  con un médico o una enfermera y sus padres	
Lugar	Clinica de adolescentes	
Tamaño de muestra (número de participantes)	
n: 40; intervención: 21, control: 19	
Intervención	DVD + cuidado usual	
Comparador	Cuidado usual	

Hipótesis de investigación	La hipótesis nula es que las medias del grupo de DVD y de sin DVD son 4.0, y la alternativa que la media del grupo No DVD es 3.0 (para cada una de las conductas de cambio y auto-eficacia para perder medidas de peso)	
Desenlaces  evaluados  y técnica de medición	Conocimiento, eficacia en la dieta, deseo de cambiar, motivación para bajar de peso, conexión con el proveedor de salud: cuestionarios	


Resultados	No hubo diferencias en el conocimiento de los adolescentes en el grupo DVD vs no DVD. Hubo efectos significativos en motivación de los adolescentes (F=11.69; gl[1,38], P=0.002) y en auto-eficacia de los adolescentes (F=10.924; gl[1,38]; P=0.002).	
Tiempo de seguimiento	6 semanas	
Pérdidas (%)	No especifica	
Fuente de financiación	Financiado por Robinson Foundation	


Conclusiones	Padres que vieron el DVD tuvieron mayores mejorías en conocimiento respecto  a obesidad que aquellos que no. Adolescentes de ambos grupos mejoraron sus medidas de motivación a perder peso y auto-eficacia de dieta, basado en cuestionarios pre y post-test. Un DVD educativo y motivacional de 7 minutos ayudó a mejorar conocimiento de los padres, pero no fue más poderoso que el cuidado standard al cambiar otros desenlaces relacionados con el peso en esta clínica de adolescentes	
  Riesgo de sesgo 		
Sesgo	Evaluación	Apoyo para la Evaluación	
Generación de la Secuencia aleatorizada	No claro	No menciona como se generó la secuencia	
Ocultación de la asignación	No claro	No se menciona en el estudio	
Cegamiento de los participantes y del personal	
No claro	El encargado de recolectar cuestionarios y proporcionar información verbal desconocía la asignación, no se hace referencia a cegamiento de los participantes	
Cegamiento de los evaluadores	Alto	No hubo cegamiento de evaluadores	
Manejo de los datos de resultado incompletos	No claro	No  se  mencionan  pérdidas  ni  manejo  de resultados incompletos	
Notificación selectiva de los resultados	Alto	Reportan   ciertos   resultados   que   no   son acompañados de los datos	


Improving  informed  consent  to  chemotherapy:  a  randomized  controlled  trial  of written information versus an interactive multimedia CD-ROM (Olver/2009)	
Diseño de estudio	Ensayo clínico aleatorizado	
Población	Pacientes de cáncer que no habían iniciado quimioterapia	
Lugar	Unidad de oncología del Hospital Royal Adelaide (RAH)	
Tamaño de muestra (número de participantes)	
n: 101; intervención: 47, control: 54	
Intervención	Understanding Cancer CD-ROM	
Comparador	Información por escrito	

Hipótesis de investigación	Probar si la información presentada antes de la quimioterapia en formato CD-ROM era superior aumentando recordación del paciente comparado con la información escrita	


Desenlaces  evaluados  y técnica de medición	Recordación del paciente, concentración, memoria a corto plazo, comprensión de lectura, ansiedad, depresión y estilos de afrontamiento. Cuestionarios y evaluación psicológica.	


Resultados	Correcta recordación número de drogas n,%: CD-ROM 26(51%) vs escrito 25(49%) p=0.43. Correcta recordación duración de tratamiento n,%: CD-ROM 30(52.6%)  vs escrito 27(47.4%) p=0.23. Correcta recordación duración de objetivo del tratamiento n,%:CD-ROM 25(44.6%) vs escrito 31(55.4%) p=0.69	
Tiempo de seguimiento	4 semanas		
Pérdidas (%)	Total: 23.7%;intervención: 21.2%, control: 25%	
Fuente de financiación	No especifica		

Conclusiones	Un CD-ROM interactivo no mejoró la recordación de pacientes con cáncer lo suficiente como para garantizar cambios en la toma de consentimientos informados	
  Riesgo de sesgo 		
Sesgo	Evaluación	Apoyo para la Evaluación	
Generación de la Secuencia aleatorizada	
Alto	Se usaron números de identificación del hospital y se aleatorizaron según pares e impares	
Ocultación de la asignación	Bajo	Asignación hecha por personal encargado	
Cegamiento de los participantes y del personal	
No claro	Mencionan cegamiento en médicos pero no son claros al respecto	
Cegamiento de los evaluadores	Alto	No hubo cegamiento	
Manejo de los datos de resultado incompletos	Bajo	Análisis por intención a tratar	
Notificación selectiva de los resultados	Bajo	Reportan   resultados   de   acuerdo   con   los objetivos y metodología planteados	


Multimedia	version	of	a	standard	medical	questionnaire	improves	patient understanding across all literacy levels. (Bryant/2009)	
Diseño de estudio	Ensayo clínico aleatorizado	
Población	Pacientes de la clínica de urología	
Lugar	Grady Memorial Hospital o Emory University Hospital	
Tamaño de muestra (número de participantes)	
n:232; intervención: 110, control: 122	

Intervención	AUA-SS (Score de severidad de síntomas en hiperplasia prostática benigna) en versión computador autoadministrada	


Comparador	AUA-SS tradicional por escrito	

Hipótesis de investigación	Pacientes que reciben esta versión multimedia entenderán mejor el AUA-SS y proveerán puntajes más precisos en sintomatología que los que completan la versión escrita tradicional	


Desenlaces  evaluados  y técnica de medición	El desenlace principal era entendimiento del paciente de la AUA-SS basado en desacuerdo o error entre puntaje de AUA-SS autoadministrado y el administrado por el entrevistador. La medida de desenlace final era usada para comparar clasificaciones de severidad usando las versiones auto-administrada y la del médico	


Resultados	Error promedio: Control 3.48 vs Multimedia 1.97, p<0.001; Número de preguntas entendidas (%): 7 preguntas, Escrito 38(33.9) vs Multimedia 58(52.7); 4-6 preguntas, Escrito 69
(61.6) vs Multimedia 46 (41.8); 1-3 preguntas, Escrito 5
(4.5)  vs  Multimedia  6  (5.5).  Concordancia  con  médico:
Escrito    80    de    112(71.4%)    vs    Multimedia    92    de
110(83.6%) p=0.04	
Tiempo de seguimiento	No especifica		
Pérdidas (%)	Total: 4.3%, control: 8.1%	
Fuente de financiación	No especifica		


Conclusiones	Como modelo, el puntaje de Síntomas de la American Urological Association en su versión  multimedia representa una emocionante oportunidad para mejorar muchas otras herramientas de tamizaje escritas ya que aumentó el entendimiento y disminuyó los errores en todos los niveles de alfabetismo posiblemente permitiendo que los médicos den un tratamiento más efectivo	
  Riesgo de sesgo 		
Sesgo	Evaluación	Apoyo para la Evaluación	
Generación de la Secuencia aleatorizada	No claro	No menciona como se generó la secuencia	
Ocultación de la asignación	No claro	No se menciona en el estudio	
Cegamiento de los participantes y del personal	
Alto	
No hubo cegamiento	
Cegamiento de los evaluadores	Alto	No hubo cegamiento	
Manejo de los datos de resultado incompletos	
Bajo	No reportan manejo de resultados incompletos pero hubo pocas pérdidas en el estudio	


Notificación selectiva de los resultados	Bajo	Reportan   resultados   de   acuerdo   con   los objetivos y metodología planteados	


Video-based sexually transmitted disease patient education: its impact on condom acquisition. (O’Donnell/1995)	
Diseño de estudio	Ensayo clínico aleatorizado	
Población	Mujeres y hombres mayores de 17 años afroamericanos e hispanos que acudían a clínica del sur de Bronx	
Lugar	Clínica de enfermedades de transmisión sexual al sur delh Bronx.	
Tamaño de muestra (número de participantes)	
3470		
Intervención	Video   que   promueve   comportamientos   sexuales   más seguros	
Comparador	Video + discusión grupal; y grupo control	

Hipótesis de investigación	1. El impacto de las intervenciones educativas basadas en video para la adquisición de preservativos. 2.  la adquisición de preservativos sería mayor en los sujetos expuestos al video más sesión interactiva que en los sujetos expuestos solamente a la intervención de vídeo.	
Desenlaces  evaluados  y técnica de medición	Tasas de adquisición de preservativos en %, evaluados por nivel de intervención	

Resultados	Proporción de condones reclamados por grupo de video 27.6% vs control 21.2% p<0.0001; proporción condones reclamados video+grupo comparado con sólo video (36.9% vs 27.6%; P < .0001).	
Tiempo de seguimiento	1 año		
Pérdidas (%)	3.6%		

Fuente de financiación	Behavioral and Prevention Research Branch, Division of Sexually Transmitted Diseases, Centers for Disease Control and Prevention, Morrisania STD Clinic, New York.	


Conclusiones	La participación en una sesión interactiva después de la visualización de vídeo aumentó significativamente la probabilidad de adquisición de preservativos. La eficacia de visualización de vídeo solo se mejoró mediante el uso de vídeos como factores desencadenantes de debates interactivos dirigidos por facilitadores entrenados.	
  Riesgo de sesgo 		
Sesgo	Evaluación	Apoyo para la Evaluación	


Generación de la Secuencia aleatorizada	
No claro	Se asignaron de manera aleatoria intervenciones a días de la clínica, pero no se especificó generación de la secuencia	
Ocultación de la asignación	No claro	No	se	menciona	ocultamiento	de	la asignación	
Cegamiento de los participantes y del personal	
Alto	
No se hizo cegamiento	
Cegamiento de los evaluadores	Alto	No se hizo cegamiento	
Manejo de los datos de resultado incompletos	Bajo	No	se	menciona	manejo	de	resultados incompletos, pero hubo pocas pérdidas	
Notificación selectiva de los resultados	Bajo	Reportan   resultados   de   acuerdo   con   los objetivos y metodología planteados	


Acceptability and preliminary feasibility of an internet/CD-ROM-based education and decision program for early-stage prostate cancer patients: randomized pilot study (Diefenbach/2012)	
Diseño de estudio	Estudio piloto clínico aleatorizado	

Población	Pacientes con cáncer de próstata diagnosticado en las ultimas 4-6semanas y sin comorbilidades que limiten las opciones de tratamiento	
Lugar	Centro médico en el noreste de los Estados Unidos	
Tamaño de muestra (número de participantes)	n=72   aleatorizados   en:   (1)	grupo   control   (folletos estándar) n=19. (2) Grupo de PIES con la adaptación n=39.
(3) PIES sin adaptación n=28	
Intervención	Prostate	Interactive	Educational	System (PIES)	con adaptación	
Comparador	2. Folleto estándar, 3. PIES sin adaptación	

Hipótesis de investigación	PIES sirve para mejorar la comprensión sobre el tratamiento del cáncer de próstata y facilitar su proceso de decisión de tratamiento y hacer frente a las preocupaciones acerca de la enfermedad	
Desenlaces  evaluados  y técnica de medición	Se aplicaron dos cuestionarios uno antes y otro después de la intervención/comparación, que  evaluaban características y resultados de toma de decisiones	


Resultados	Información provista fue confusa, media SD: Control 1.84 (1.12), PIES adaptado 1.25 (0.57), PIES sin adaptación 1.50 (0.82), p=0.05.Información provista fue demasiada: Control 2.47 (1.22), PIES adaptado 1.47 (0.98), PIES sin adaptación 1.10 (0.31) p=0.01. Información es útil  para tomar decisiones: Control 1.79 (0.92), PIES adaptado 4.29
(0.64), PIES sin adaptación 4.10 (1.07), p=0.01. Me tranquilizó respecto a mi decisión: Control 2.68 (1.06), PIES adaptado 3.12 (0.83), PIES sin adaptación 3.46 (0.89), p =0.04.Hizo que estuviera más ansioso sobre mi decisión: Control 3.46 (0.89), PIES adaptado 2.45 (1.09), PIES sin
adaptación 2.40 (1.27), p=0.03	
Tiempo de seguimiento	30 meses		
Pérdidas (%)	26.3%		
Fuente de financiación	National Cancer Institute (CA6136-05, CA90904-02) y el Departamento de Defensa	


Conclusiones	Pacientes en los grupos PIES en comparación con los del grupo de control fueron significativamente más propensos a reportar: mayores niveles de confianza en sus opciones de tratamiento; obtener más información que la atención estándar para la toma de decisión respecto al tratamiento, sin embargo no cambiaron las preferencias de tratamiento entre el instante 1(t1) y el 2 (t2); y reportaron disminución de la ansiedad.	
  Riesgo de sesgo 		
Sesgo	Evaluación	Apoyo para la Evaluación	
Generación de la Secuencia aleatorizada	No claro	Se  aleatorizaron  2:2:1  pero  no  menciona generación de la secuencia	
Ocultación de la asignación	No claro	No se menciona en el estudio	
Cegamiento de los participantes y del personal	
Alto	
No hubo cegamiento	
Cegamiento de los evaluadores	Alto	No hubo cegamiento	
Manejo de los datos de resultado incompletos	Alto	No	se	menciona	manejo	de	resultados incompletos	
Notificación selectiva de los resultados	Bajo	Reportan   resultados   de   acuerdo   con   los objetivos y metodología planteados	


Patient satisfaction and information gain after the preanesthetic visit: a comparison of face-to-face interview, brochure, and video (Snyder-Ramos/2005)	
Diseño de estudio	Ensayo prospectivo aleatorizado	


Población	197   pacientes   quirurgicos   que   iban   a   someterse   a anestesia general	
Lugar	No especifica		
Tamaño de muestra (número de participantes)	
284		
Intervención	Video más entrevista	
Comparador	Entrevista solamente, y folleto más entrevista	
Hipótesis de investigación	No especifica		

Desenlaces  evaluados  y técnica de medición	El grado de satisfacción de los pacientes y la ganancia de información se probó con la correlación de Spearman. El cuestionario se respondió después de la entrevista pre anestésica y antes de la administración de cualquier medicación	


Resultados	Suma puntaje de satisfacción pacientes, media SD (rango):
Entrevista 27.4 ± 3.7 (10–30), folleto 27.9 ± 2.8 (20–30),
video  29.4  ±  1.0  (24–30).  Diferencias  significativas  en
entrevista   vs   video   (p=0.00001)   y   folleto   vs   video
(p=0.002). Suma puntaje ganancia de información, media
SD (rango): Entrevista 4.3 ± 1.7 (0–6), folleto 4.8 ± 1.3 (2–
6),  video  5.6  ±  0.6  (3–6).  Diferencias  significativas  en
entrevista   vs   video   (p=0.000001)   y   folleto   vs   video
(p=0.0008)	
Tiempo de seguimiento	3 meses		
Pérdidas (%)	4.2%		
Fuente de financiación	Subvención  de  Abbott  GmbH,  Wiesbaden,  University  of Heidelberg, Germany	


Conclusiones	El grupo de video además de la entrevista mostró la más alta puntuación en satisfacción y ganancia de información. Los resultados sugieren que el uso de un video documental para complementar una entrevista preoperatoria puede aumentar satisfacción y  maximizar la ganancia de información del paciente, esta ultima especialmente en pacientes jóvenes.	
  Riesgo de sesgo 		
Sesgo	Evaluación	Apoyo para la Evaluación	
Generación de la Secuencia aleatorizada	
Bajo	Aleatorizados a uno de los tres grupos por un procedimiento generado por computador con grupos inicialmente iguales	
Ocultación de la asignación	No claro	No menciona como se hizo	


Cegamiento de los participantes y del personal	
Alto	
No hubo cegamiento	
Cegamiento de los evaluadores	Alto	No hubo cegamiento	
Manejo de los datos de resultado incompletos	Bajo	No	menciona	manejo	de	resultados incompletos pero tuvieron pocas pérdidas	
Notificación selectiva de los resultados	Bajo	Reportan   resultados   de   acuerdo   con   los objetivos y metodología planteados	


Effects of a prototype Internet dissonance-based eating disorder prevention program at 1- and 2-year follow-up (Stice/2014)	
Diseño de estudio	Ensayo aleatorizado	
Población	Estudiantes universitarias con insatisfacción corporal con edad promedio de 21,6 DE:6,6 años	
Lugar	Universidad	
Tamaño de muestra (número de participantes)	
n=107	
Intervención	Programa en internet (eBody Project)	
Comparador	2. Programa en grupo (Body project), 3. Video educativo de 55 min, 4. folleto educativo	
Hipótesis de investigación	No especifica	


Desenlaces  evaluados  y técnica de medición	Ideal-Body Stereotype Scale-Revised evaluó la interiorización del ideal de delgadez; Body Parts Scale la satisfacción e insatisfacción; Dutch Restrained Eating Scale la frecuencia de diferentes comportamientos de dieta; 21- item Beck Depression Inventory el afecto depresivo; la patología alimentaria con una entrevista teniendo en cuenta los síntomas diagnósticos del DSM-IV; y se midió el IMC	


Resultados	Los participantes de internet mostraron reducciones en factores de riesgo para desórdenes alimentarios en relación a las dos condiciones control en uno y dos años de seguimiento (M d = .34 y .17 respectivamente), pero los efectos fueron menores que en las comparaciones en paralelo para los participantes del grupo (M d = .48 y. 43 respectivamente). Sin embargo, la intervención con internet produjo una mayor prevención en ganancia de peso en dos años de seguimiento (M d = .80 and .73 respectivamente), los cuales fueron mayores que los efectos en paralelo para el grupo (M d = .19 and .47 respectivamente)	


Tiempo de seguimiento	2 años		
Pérdidas (%)	4.6%		
Fuente de financiación	National Institutes of Health	


Conclusiones	eBody Project basado en Internet fue capaz de utilizar los procedimientos de inducción y disonancia para reducir los factores de riesgo y síntomas de los trastornos de la alimentación. Sin embargo, los hallazgos sugieren que podría ser mejor implementar el Body Project basado en grupo sobre el eBody Project si el objetivo es reducir los factores de riesgo  y síntomas que  persisten en el  largo plazo de seguimiento (2 años)	
  Riesgo de sesgo 		
Sesgo	Evaluación	Apoyo para la Evaluación	
Generación de la Secuencia aleatorizada	Bajo	Aleatorizados	con	tabla	de	números aleatorios	
Ocultación de la asignación	No claro	No se menciona en el estudio	
Cegamiento de los participantes y del personal	
Bajo	Las asistentes de investigación no conocían intervención de cada participante	
Cegamiento de los evaluadores	Alto	No se hizo cegamiento	
Manejo de los datos de resultado incompletos	Bajo	No se reporta manejo de datos incompletos, pero la pérdida fue mínima	
Notificación selectiva de los resultados	Bajo	Reportan   resultados   de   acuerdo   con   los objetivos y metodología planteados	


Videotape increases parent knowledge about poliovirus vaccines and choices of polio vaccination schedules (Dunn/1998)	
Diseño de estudio	Ensayo prospectivo aleatorizado	
Población	Padres con niños de 2-3 meses de edad que cumplieron el primer set de inmunizaciones incluido la vacuna del polio	
Lugar	Consultorios   pediátricos   y   clínica   de   vacunación   en Lansing	
Tamaño de muestra (número de participantes)	
n=318	
Intervención	Cinta de vídeo + VIS	
Comparador	VIS solamente (vaccine information statement)	
Hipótesis de investigación	No especifica	


Desenlaces  evaluados  y técnica de medición	Cambio en el conocimiento sobre la poliomielitis, su transmisión, características de sus vacunas, y las opciones de los planes de vacunación, y la opinión de los padres sobre la eficacia de las intervenciones, según lo medido por cuestionarios pre y postintervención.	


Resultados	Diferencia  media  (IC  95%):En  clínica  HMO  modelo  B Video+VIS 5.6 (3.6–7.5) vs VIS -0.9 (-2.6–0.8) p<0.001; en
clínica del departamento de salud pública  Video+VIS  7.2 (6.2–8.3)	vs	VIS	2.7	(1.7–3.7)	p<0.001;	en	clínica
universitaria B Video+VIS 7.7 (6.1–9.3) vs VIS 0.8 (-0.6–
2.2) p<0.001	
Tiempo de seguimiento	3 meses	
Pérdidas (%)	9.7%	

Fuente de financiación	Beca del decano asociado para programas de investigación y la Office of Medical Education, Research, and Development, Michigan State University	


Conclusiones	Una discusión de los riesgos / beneficios de las dos vacunas de poliovirus y tres programas de vacunación contra la poliomielitis podría comunicarse de manera efectiva a través de una presentación de video. La cinta de vídeo, con o sin haber leído el VIS era universalmente más eficaz que el VIS solo en el aumento del conocimiento	
  Riesgo de sesgo 		
Sesgo	Evaluación	Apoyo para la Evaluación	
Generación de la Secuencia aleatorizada	No claro	Aleatorizado  por  días,  pero  no  mencionan generación de la secuencia	
Ocultación de la asignación	
Bajo	La aleatorización difería semana a semana y los archivos  al respecto se mantenían almacenados fuera del área de registro	
Cegamiento de los participantes y del personal	
Alto	
No hubo cegamiento	
Cegamiento de los evaluadores	Alto	No hubo cegamiento	
Manejo de los datos de resultado incompletos	Bajo	No	mencionan	manejo	de	resultados incompletos pero no hubo grandes pérdidas	
Notificación selectiva de los resultados	Bajo	Reportan   resultados   de   acuerdo   con   los objetivos y metodología planteados	


Randomised trial comparing an interactive multimedia decision aid with a leaflet and a video to give information about prenatal screening for Down syndrome (Leung/2004)	
Diseño de estudio	Ensayo aleatorizado	


Población	Mujeres chinas	
Lugar	Clínica prenatal de Hospital Universitario Tsan Yuk	
Tamaño de muestra (número de participantes)	n=201  aleatorizados  en  intervención  n=100  y  control n=101	
Intervención	Multimedia, video y folleto	
Comparador	Video y folleto	
Hipótesis de investigación	El uso de ayudas multimedia mejorará la decisión de las mujeres respecto al tamizaje prenatal para Síndrome de Down aún más que el uso de folleto o de video	

Desenlaces  evaluados  y técnica de medición	Se evaluó la captación final de mujeres del tamizaje para Síndrome de Down; la medida secundaria incluyó decisión inicial, entendimiento y satisfacción con la  información que recibieron, evaluado con un cuestionario auto- aplicado.	


Resultados	Decisión final n(%), diferencia con IC 95%:
Tamizaje:  control  81  (80.2)  vs  intervención  71  (71.0),
diferencia 9.2 (−2.6 - 21.0)
Amniocentesis: control 16 (15.8) vs intervención 22(22.0),
diferencia −6.2 (−17.0 - 4.6)
Muestra   de   vellosidad   coriónica:   control   1   (1.0)   vs intervención 1 (1.0).
Entendimiento: 54.1% en control y 55.1% en intervención refirieron no tener más preguntas	
Tiempo de seguimiento	12 meses		
Pérdidas (%)	3.9%		
Fuente de financiación	No especifica		

Conclusiones	Después de recibir más información a través de la intervención, la mujer en el grupo intervención tenía una mejor comprensión, pero no hubo diferencia en la decisión final de tomar la prueba.	
  Riesgo de sesgo 		
Sesgo	Evaluación	Apoyo para la Evaluación	
Generación de la Secuencia aleatorizada	No claro	Aleatorización   1:1,   no   aclaran   cómo   se obtuvo la secuencia	
Ocultación de la asignación	Bajo	Asignación	hecha	con	sobres	opacos consecutivos	
Cegamiento de los participantes y del personal	
Alto	
No hubo cegamiento	
Cegamiento de los evaluadores	Alto	No hubo cegamiento	
Manejo de los datos de	Bajo	Análisis por intención a tratar	


resultado incompletos			
Notificación selectiva de los resultados	Bajo	Reportan   resultados   de   acuerdo   con   los objetivos y metodología planteados	


A  randomized  comparative  effectiveness  trial  of  using  cable  television  to  deliver diabetes prevention programming (Ackermann/2014)	
Diseño de estudio	Ensayo aleatorizado	
Población	Adultos con factores de riesgo para diabetes	
Lugar	2 ciudades de USA (Filadelfia, Knoxville)	
Tamaño de muestra (número de participantes)	
314 participantes, solo video 155, video más web 159	
Intervención	Sólo video (VOD)	
Comparador	Sesiones   de   estilo   de   vida   con   video   por   cable   y herramientas de ayuda en la web	
Hipótesis de investigación	Apoyo adicional individualizado mejora la pérdida de peso	
Desenlaces  evaluados  y técnica de medición	Peso era medido por BodyTrace eScale a través de la señal del teléfono. Se pesaban semanalmente, los pesos era recolectados y registrados en el sistema	


Resultados	La media del porcentaje total de pérdida de peso fue 3.3% (95% CI 2.7-3.9%) a 5 meses y 3.3% (95% CI 2.2-4.3%) a
12 meses,  sin diferencias significativas entre brazos del estudio: 3.7% (95% CI 1.9-5.0%) para VOD y VOD y herramientas 2.9% (95% CI 0.7-4.2%) con P=0.16. A 12 meses los cambios seguían sin ser significativamente diferentes P=0.26	
Tiempo de seguimiento	12 meses	
Pérdidas (%)	55%	
Fuente de financiación	No especifica	


Conclusiones	Con programas domiciliarios  basados  en evidencia para prevención en Diabetes, hechos en formato de "reality", ofrecidos con o sin herramientas online de apoyo, pueden obtenerse pérdidas modestas de peso consistentes con estudios de implementación previos y programas que usan contenido similar	
  Riesgo de sesgo 		
Sesgo	Evaluación	Apoyo para la Evaluación	
Generación de la Secuencia aleatorizada	Bajo	Secuencia generada por computador	
Ocultación de la asignación	No claro	No se menciona en el estudio	


Cegamiento de los participantes y del personal	
Alto	
No hubo cegamiento	
Cegamiento de los evaluadores	Alto	No hubo cegamiento	
Manejo de los datos de resultado incompletos	Bajo	Análisis	por	intención	a	tratar	con imputación de datos perdidos	
Notificación selectiva de los resultados	Bajo	Reportan   resultados   de   acuerdo   con   los objetivos y metodología planteados	


Educational Effectiveness of an HIV Pretest Video for Adolescents: A Randomized Controlled Trial (Calderon/2011)	
Diseño de estudio	Ensayo aleatorizado controlado	
Población	Pacientes  entre   15-21  años  sexualmente  activos,   que hablaran inglés y se encontraran medicamente estables.	
Lugar	Servicio de urgencias de Centro Médico Jacobi, Centro de cuidado nivel 1 de trauma y terciario del Bronx	
Tamaño de muestra (número de participantes)	
200, 100 con video y 100 con asesoría persona a persona	
Intervención	Video   educacional   de   VIH   desarrollado   a   partir   de investigación cualitativa en el Bronx	
Comparador	Asesoría   persona   a   persona   realizada   por   personal capacitado en VIH	

Hipótesis de investigación	La efectividad de asesoramiento con video sobre VIH amigable para adolescentes es mayor respecto al asesoramiento persona a persona en el grupo de mayor prevalencia de VIH.	


Desenlaces  evaluados  y técnica de medición	Lo primero era el entendimiento del paciente sobre la información que fue determinado por puntajes cuantitativos en un test de conocimiento de 10 preguntas. LA satisfacción con los procedimientos fue evaluada mediante preguntas usando escala ordinal de 6 5-puntos, Los datos fueron recogido en Microsoft Excel, modelo de regresión logística multivariable fue construido para identificar características asociadas con el acuerdo de tomarse una prueba para VIH. El análisis monovariable fue usado para identificar covariables moderadamente asociadas con el resultado.	


Resultados	Media de conocimiento sobre VIH post-intervención fue mayor en el grupo video comparado con el control (78.5% y 66.3%, respectivamente; diferencia de 12.2% [P=0.01; 95%(CI) para la diferencia: 3.2%–16.5%]). Más participantes en el grupo video aceptaron recibir la prueba	


	de VIH que los del grupo control (51% vs 22%, respectivamente; P=0.01). El grupo de asesoría tuvo una satisfacción promedio de 25.4/30 comparado con 28.6/30 del grupo intervención (p=0.0001).	
Tiempo de seguimiento	No especifica	
Pérdidas (%)	Sin pérdidas	
Fuente de financiación	Beca  de  National  Institutes  of  Health  Institute  of  Child Health and Human Development	


Conclusiones	Una herramienta amigable para adolescentes como un video VIH reduce las deficiencias del conocimiento sobre VIH y aumenta su participación pruebas en una mayor proporción que los asesoramientos persona a persona. Sin embargo, se requieren más estudios para su implementación.	
  Riesgo de sesgo 		
Sesgo	Evaluación	Apoyo para la Evaluación	
Generación de la Secuencia aleatorizada	
Bajo	La   secuencia   fue   generada   por   bloques usando	computador
(www.randomization.com)	
Ocultación de la asignación	Bajo	Asignación fue hecha con sobres opacos	
Cegamiento de los participantes y del personal	
Alto	
No hubo cegamiento	
Cegamiento de los evaluadores	Alto	No hubo cegamiento	
Manejo de los datos de resultado incompletos	Bajo	No hubo datos perdidos	
Notificación selectiva de los resultados	Bajo	Reportan   resultados   de   acuerdo   con   los objetivos y metodología planteados	


Effect   of   audiovisual   treatment   information   on   relieving   anxiety   in   patients undergoing impacted mandibular third molar removal (Choi/2015)	
Diseño de estudio	Ensayo clínico aleatorizado	
Población	Adultos jóvenes	
Lugar	Departamento   dental   de   los   servicios   de   salud   del Comando de Defensa de Seúl , República de Corea	
Tamaño de muestra (número de participantes)	Total de pacientes incluidos: 51. Grupo estudio: 20 hombres y 5 mujeres. grupo control: 21 hombres y 5 mujeres	


Intervención	En el grupo a estudio se realizó una explicación verbal previa al procedimiento de extracción del tercer molar sobre las probables complicaciones de la cirugía, seguido de una presentación en Power Point con ayudas audiovisuales en un lenguaje sencillo y claro.	

Comparador	En el grupo control se realizó una explicación verbal previa al procedimiento de extracción del tercer molar sobre las probables complicaciones de la cirugía	

Hipótesis de investigación	El uso de  un  medio audiovisual para  explicar  a  los pacientes previos a una cirugía de extracción del tercer molar aumenta el conocimiento sobre las posibles complicaciones y puede disminuir la ansiedad antes y después del procedimiento.	


Desenlaces  evaluados  y técnica de medición	Se evaluó el estado de ansiedad de los pacientes y si recordaban las complicaciones de la cirugía. Técnicas: State-Trait Anxiety Inventory, the Dental Anxiety Scale y un cuestionario cobre autopercepción de ansiedad, realizados inmediatamente después de la cirugía y un cuestionario sobre las potenciales complicaciones realizado una semana después cuando los pacientes volvían al centro.	


Resultados	Potenciales complicaciones posoperatorias que los pacientes recordaban una semana después de la cirugía n(%): Reacciones alérgicas escrito 2 (7.7) vs audiovisual 8
(32.0), p<0.05.Trismus escrito 3 (11.5) vs audiovisual 9(36.0), p<0.05.  Medias de ansiedad: Auto-reporte,  1 semana después de la cirugía media(SD): escrito 2.5 (1.8) vs audiovisual 0.7 (1.2), p<0.05	
Tiempo de seguimiento	Dos semanas		
Pérdidas (%)	Sin pérdidas		
Fuente de financiación	No especifica		


Conclusiones	Los resultados sugirieron que informar a los pacientes con medios auidiovisuales tales como una presentación puede mejorar el conocimiento sobre complicaciones en el postoperarorio y además lleva a una disminución de ansiedad luego del procedimiento de extracción del tercer molar.	
  Riesgo de sesgo 		
Sesgo	Evaluación	Apoyo para la Evaluación	
Generación de la Secuencia aleatorizada	No claro	No especifican generación de la secuencia	
Ocultación de la asignación	Alto	No se menciona ocultamiento	


Cegamiento de los participantes y del personal	
Alto	
No hubo cegamiento	
Cegamiento de los evaluadores	Alto	No hubo cegamiento	
Manejo de los datos de resultado incompletos	Bajo	No hubo datos perdidos	
Notificación selectiva de los resultados	Bajo	Reportan   resultados   de   acuerdo   con   los objetivos y metodología planteados	


Providing letters and audiotapes to supplement a prenatal diagnostic consultation: Effects on later distress and recall (Cope/2003)	
Diseño de estudio	Ensayo clínico aleatorizado	
Población	Mujeres gestantes	
Lugar	Centro  de  medicina  fetal  del  hospital  para  mujeres  de Birmingham, Reino Unido.	
Tamaño de muestra (número de participantes)	117 mujeres con sospecha de anomalía fetal repartidas en 4 grupos, 3 de los cuales de 29 mujeres y un grupo de 30.	
Intervención	Información  escrita  de  forma  no  técnica  sumada  a  una grabación.	

Comparador	En el primer grupo se realizó el procedimiento estándar, en el segundo las pacientes recibieron un resumen de la información de forma escrita de forma clara no técnica, en el tercero se suministra una grabación.	

Hipótesis de investigación	Dar información en la mitad del período de gestación, aumenta el conocimiento y disminuye la ansiedad en las futuras madres. Es posible que el grado de severidad afecte la capacidad de recordar la información, o de producir depresión y ansiedad.	

Desenlaces  evaluados  y técnica de medición	Se evaluó ansiedad y depresión por medio del self-report State-Trait Anxiety Inventory (STAI) Y Beck Depression Inventory (BDI) antes y después de la realización del scan. Además se realizaron entrevistas vía telefónica dos semanas después.	


Resultados	El grupo de la grabación tuvo significativamente menores puntajes en ansiedad 41.44 (14.71) que el grupo control 44.92 (13.56) (diferencia = 10.70 [95% CI 3.56–17.83], p <
0.01). No hubo diferencias en depresión y  no  hubo cambios en nivel de recordación en ninguno de los grupos	
Tiempo de seguimiento	Dos semanas	
Pérdidas (%)	4.27%	
Fuente de financiación	Beca  para  Investigación  en  el  Hospital  de  Mujeres  de Birmingham.	


Conclusiones	El dar material adicional, particularmente una grabación, durante los controles prenatales con scan parece disminuir el grado de ansiedad comparado con la práctica habitual. El hecho de sumar la grabación a información por escrito no parece aumentar ni disminuir la capacidad de retener los aspectos clave por parte de las pacientes.	
  Riesgo de sesgo 		
Sesgo	Evaluación	Apoyo para la Evaluación	
Generación de la Secuencia aleatorizada	Bajo	Sistema	de	aleatorización	telefónico generado por computador	
Ocultación de la asignación	Alto	No se menciona ocultamiento	
Cegamiento de los participantes y del personal	
Alto	
No hubo cegamiento	
Cegamiento de los evaluadores	Alto	No hubo cegamiento	
Manejo de los datos de resultado incompletos	Bajo	No	mencionan	manejo	de	resultados incompletos pero hubo pocas pérdidas	
Notificación selectiva de los resultados	Bajo	Reportan   resultados   de   acuerdo   con   los objetivos y metodología planteados	


Randomized  controlled  trial  to  assess  the   effectiveness  of  a  videotape   about radiotherapy (Harrison/2001)	
Diseño de estudio	Ensayo clínico aleatorizado	
Población	Pacientes con cáncer de cabeza, cuello, vejiga o próstata que requerían radioterapia radical	
Lugar	Consulta de oncología clínica	
Tamaño de muestra (número de participantes)	
n: 274, intervención 141, control 133	
Intervención	Video e información escrita	
Comparador	Información escrita	
Hipótesis de investigación	No especifica	

Desenlaces  evaluados  y técnica de medición	Preocupación por la radioterapia fue medida con un cuestionario completado por pacientes antes de la aleatorización e inmediatamente después de iniciar el tratamiento. Ansiedad general fue medida usando la escala de ansiedad Hospital Anxiety and Depression Scale	


Resultados	Razón de la preocupación, disminución n (%):  Radioterapia en general video 22 (16.7), escrito 20 (15.1)
Dolor del tratamiento video 38 (28.8), escrito 24 (18.2)
Duración  del  tratamiento  video  25  (19.0),  escrito	30
(22.7)
Seguridad  del  tratamiento  video  24  (18.2),  escrito	24
(18.2)
Seguridad para acompañantes video 18 (13.6), escrito 19
(14.7)
Pérdida del cabello video 17 (13.1), escrito 35 (26.7)
Sentirse mal video escrito 24 (18.8) 17 (13.1)
Tensión respecto al tratamiento video 29 (22.7), escrito 17
(13.3)
Recostarse  bajo  máquinas  video  23  (18.0),  escrito  18
(14.0)	
Tiempo de seguimiento	6 semanas		
Pérdidas (%)	No especifica		
Fuente de financiación	NHSE NW		


Conclusiones	La ansiedad en general no disminuyó antes de inciar el tratamiento pero si disminuyó en el ultimo día de tratamiento. Esta reducción se mantuvo únicamente en el periodo post-tratamiento en el grupo de video. La diferencia absoluta entre grupos de estudio 6 semanas después de radioterapia fue de 9.7%, no significativa (χ2 = 3.41, df = 1, P = 0.065), pero este estudio no fue diseñado para detectar una diferencia significativa de esta magnitud	
  Riesgo de sesgo 		
Sesgo	Evaluación	Apoyo para la Evaluación	
Generación de la Secuencia aleatorizada	No claro	Secuencia hecha por un grupo externo, no se especifica la generación de la secuencia	
Ocultación de la asignación	No claro	No especifica cómo se hizo	
Cegamiento de los participantes y del personal	
Alto	
No hubo cegamiento	
Cegamiento de los evaluadores	Alto	No hubo cegamiento	
Manejo de los datos de resultado incompletos	No claro	No  menciona  manejo,  ni  cuántas  pérdidas tuvo el estudio	
Notificación selectiva de los resultados	Bajo	Reportan   resultados   de   acuerdo   con   los objetivos y metodología planteados	


Persistent   effects   of   a   pedagogical   device   targeted   at   prevention   of   severe hypoglycaemia: A randomized, controlled study (Nordfeldt/2005)	
Diseño de estudio	Ensayo clínico aleatorizado	
Población	Menores de 19 años con Diabetes tipo 1	
Lugar	3 hospitales		
Tamaño de muestra (número de participantes)	
n:332		
Intervención	Video  y  folleto  con  información  sobre  prevención  de hipoglicemia	
Comparador	Video y folleto con información general sobre Diabetes, o manejo tradicional	
Hipótesis de investigación	La reducción reportada de hipoglicemia se mantendría por un período de 24 meses	

Desenlaces  evaluados  y técnica de medición	Desenlaces primarios fueron hipoglicemia severa requiriendo asistencia y HbA1c. Diseminación, nivel de lectura/inspección, actitudes de los pacientes y contacto extra con cuidadores a través de cuestionarios	


Resultados	Los pacientes del grupo intervención que reportaron hipoglicemia severa a los 24 meses, 18 (26%), fueron menos comparado con los que reportaron hipoglicemia severa al inicio 29 (41%), (p=0.035). No hubo diferencias significativas en los controles respecto a la medición basal. No hubo diferencias entre grupos para HbA1c. Frecuencia de uso, media (rango): Folleto intervención 2 (1–20) vs control 1 (1–6), p=0.01. Video intervención 2 (1–15) vs control 1 (1–20), p=0.04. Lectura y revisión, proporción de usuarios: Folleto intervención 33% vs control 14%, p=0.006. Uso futuro anticipado, proporción de usuarios: Folleto Intervención 59% vs control 30%, p=0.0003	
Tiempo de seguimiento	24 meses		
Pérdidas (%)	Total: 25%		
Fuente de financiación	No especifica		


Conclusiones	Dispositivos pedagógicos distribuidos en masa tales como programas de video de alta calidad y folletos pueden alcanzar un gran nivel de diseminación, y contribuir a la prevención de hipoglicemia severa por un largo período de tiempo, siendo un complemento costo-efectivo al cuidado tradicional	
  Riesgo de sesgo 		
Sesgo	Evaluación	Apoyo para la Evaluación	
Generación de la Secuencia aleatorizada	No claro	No  menciona  generación  de  la  secuencia aleatoria	


Ocultación de la asignación	Alto	No se menciona en el estudio	
Cegamiento de los participantes y del personal	
Bajo	Pacientes  y  personal  fueron  cegados  a  la asignación	
Cegamiento de los evaluadores	Alto	No hubo cegamiento	
Manejo de los datos de resultado incompletos	Bajo	Análisis por intención a tratar	
Notificación selectiva de los resultados	Bajo	Reportan   resultados   de   acuerdo   con   los objetivos y metodología planteados	


Effectiveness   of   an   informative   video   on   reducing   anxiety   levels   in   patients undergoing elective coronarography: An RCT (Ruffinengo/2009)	
Diseño de estudio	Ensayo clínico aleatorizado	

Población	Pacientes hospitalizados en el departamento de Cardiología con historia previa de infarto agudo de miocardio o angina y que se encontraban la necesidad de ser llevados a coronarografía electiva	
Lugar	Unidad de Cardiología en el ASO Mauriziano Umberto 1° Hospital en Torino	
Tamaño de muestra (número de participantes)	
n: 93, intervención: 48, control: 45	
Intervención	Video informativo	
Comparador	Cuidado standard	
Hipótesis de investigación	No especifica	
Desenlaces  evaluados  y técnica de medición	Escala Spielberger para medir ansiedad antes del procedimiento y satisfacción medida usando una  escala con indicaciones semánticas	


Resultados	Niveles de ansiedad:
Diferencia	media	standard	44.710	vs	video	36.58, p=0.00001. Nivel de satisfacción standard 65.227 vs video
87.417   p=0.00001.   Presencia   de   ansiedad   moderada- severa: RR intervención a control 0.60 (IC 95%: 0.41/0.89)	
Tiempo de seguimiento	4 meses	
Pérdidas (%)	No especifica	
Fuente de financiación	No especifica	

Conclusiones	El uso de video informativo en departamentos de cardiología prueba ser altamente recomendado como un instrumento    para    disminuir    ansiedad    y    aumentar	


	significativamente el nivel de satisfacción derivado de la información recibida	
  Riesgo de sesgo 		
Sesgo	Evaluación	Apoyo para la Evaluación	
Generación de la Secuencia aleatorizada	No claro	Se aleatorizaron semanas con un generador de números aleatorios	
Ocultación de la asignación	Alto	No se menciona ocultación	
Cegamiento de los participantes y del personal	
Alto	
No hubo cegamiento	
Cegamiento de los evaluadores	Alto	No hubo cegamiento	
Manejo de los datos de resultado incompletos	No claro	No  mencionan  ni  pérdidas  ni  manejo  de datos perdidos	
Notificación selectiva de los resultados	Bajo	Reportan   resultados   de   acuerdo   con   los objetivos y metodología planteados	


Visual presentations of efficacy data in direct-to-consumer prescription drug print and television advertisements: A randomized study (Sullivan/2014)	
Diseño de estudio	Estudio aleatorizado controlado	
Población	8040 adultos con colesterol alto.	
Lugar	Online	
Tamaño de muestra (número de participantes)	
2504	
Intervención	Ayudas visuales (información en directo-consumidor) impresión o anuncio de televisión	
Comparador	Ayudas no visuales (tortas, barras, tablas o pictogramas).	

Hipótesis de investigación	Las barras, pictogramas y tablas podrían mejorar  la eficacia del conocimiento de la información, mientras que las tortas no. El número de gente que mostrara efectos podría ser moderado.	
Desenlaces  evaluados  y técnica de medición	Preguntas de recordación de la información presentada, percepción de riesgos, actitud respecto al medicamento, recordación de riesgos	


Resultados	Para anuncios de televisión, cualquier ayuda visual comparado con no ayuda, tuvo mayor eficacia al recordar datos de la droga. Porcentaje de respuestas correctas para anuncios de TV: Tortas 56.2, barras68.6, tablas 52.2, pictogramas 47.9, no visual 27.8 (p<0.005)	
Tiempo de seguimiento	1 mes	


Pérdidas (%)	No especifica		
Fuente de financiación	Food and Drug Administration	


Conclusiones	Incluir información cuantitativa con ayudas visuales ayuda a aumentar la mantener la información precisa. Casi todas las ayudas visuales tuvieron un beneficio. Los gráficos y barras tuvieron más éxito. La eficacia mejoró con ayudas visuales, pero no afecto la comprensión del riesgo. El uso de ciertos tipos de ayudas visuales en la publicidad ayuda a informar sobre las ventajas y desventajas de los beneficios y riesgos de las decisiones de tratamiento y discusiones.	
  Riesgo de sesgo 		
Sesgo	Evaluación	Apoyo para la Evaluación	
Generación de la Secuencia aleatorizada	No claro	No menciona generación de la secuencia	
Ocultación de la asignación	No claro	No menciona ocultamiento	
Cegamiento de los participantes y del personal	
Alto	
No hubo cegamiento	
Cegamiento de los evaluadores	Alto	No hubo cegamiento	
Manejo de los datos de resultado incompletos	No claro	No mencionan datos incompletos ni manejo	
Notificación selectiva de los resultados	
No claro	Los resultados corresponden con los objetivos pero no se presentan de forma clara	


Extended preoperative patient education using a multimedia DVD—impact on patients receiving a laparoscopic cholecystectomy: a randomised controlled trial (Wilhelm/2009)	
Diseño de estudio	Ensayo clínico controlado y prospectivo.	

Población	Asistente a cursos prequirúrgicos (cita preanestésica) de colecistectomía laparascópica (nacionales y extranjeros de Alemania)	
Lugar	Un hospital en Alemania	
Tamaño de muestra (número de participantes)	
259	
Intervención	Cita conversacional + DVD	
Comparador	Conversación   en   cita   sin   uso   de   ninguna   estrategia audiovisual.	
Hipótesis de investigación	El   uso   de   estrategias   audiovisuales   de   gran   formato ayudan a los procesos de información de los pacientes	


Desenlaces  evaluados  y técnica de medición	Comprensión del consentimiento informado	

Resultados	Hubo una diferencia significativa en la media del puntaje de conocimiento para el grupo DVD 19.88 vs grupo control 17.58 (p=0,001)	
Tiempo de seguimiento	No especifica		
Pérdidas (%)	18.2%		
Fuente de financiación	No especifica		

Conclusiones	Los pacientes podrían ser informados de mejor manera por medio de estrategias multimedia previo a  cirugías. Este tipo de herramientas no pueden reemplazar la interacción interpersonal.	
  Riesgo de sesgo 		
Sesgo	Evaluación	Apoyo para la Evaluación	
Generación de la Secuencia aleatorizada	No claro	Lista	de	aleatorización,	no	menciona generación de secuencia	
Ocultación de la asignación	No claro	No menciona ocultamiento	
Cegamiento de los participantes y del personal	
Alto	
No hubo cegamiento	
Cegamiento de los evaluadores	Alto	No hubo cegamiento	
Manejo de los datos de resultado incompletos	Alto	No	menciona	manejo	de	resultados incompletos	
Notificación selectiva de los resultados	Bajo	Reportan   resultados   de   acuerdo   con   los objetivos y metodología planteados	


Randomized  study  of  the  effect  of  video  education  on  heart  failure  healthcare utilization, symptoms, and self-care behaviors. (Albert/2007)	
Diseño de estudio	Ensayo clínico aleatorizado	
Población	Pacientes hospitalizados	
Lugar	Hospital público	
Tamaño de muestra (número de participantes)	
112	
Intervención	Educación estándar + video educación	
Comparador	Educación estándar	
Hipótesis de investigación	El uso de estrategias complementarias a las estandar, proporcionan un mejor proceso de comprensión del autocuidado y su adherencia.	


Desenlaces  evaluados  y técnica de medición	Regreso o re consulta (uso más de una vez de servicios de emergencia). Porcentaje de pacientes tratados con dolor en el pecho vs no tratados.	


Resultados	Uso de recursos de cuidado médico a los 90 días n, (%): Ayuda telefónica standard 13 (33) vs standard + video 5 (14), p=0.04. Recibir literatura sobre falla cardíaca: standard 8(21) vs standard + video 16(44), p=0.03. Dosis adicional de diurético: standard 8(21) vs standard + video 1(3), p=0.02. Cambio en media de número de síntomas a los 90 días: standard -2.6 vs standard + video -4,3, p=0.04. Síntomas que mejoraron DVD más que el control: edema y fatiga con ejercicio	
Tiempo de seguimiento	3 meses	
Pérdidas (%)	32.14%	
Fuente de financiación	No especifica	


Conclusiones	Las estrategias con video educación incrementan la adherencia de pacientes con enfermedad cardiaca en términos de autocuidado durante los primeros 90 días después de la hospitalización, VE requieren menos comunicación telefónica.	
  Riesgo de sesgo 		
Sesgo	Evaluación	Apoyo para la Evaluación	
Generación de la Secuencia aleatorizada	Bajo	Código   de   aleatorización   de   Quantitative Health Sciences	
Ocultación de la asignación	Bajo	Sobres individuales	
Cegamiento de los participantes y del personal	
Bajo	
Investigadores cegados a asignación	
Cegamiento de los evaluadores	Alto	No hubo cegamiento	
Manejo de los datos de resultado incompletos	Alto	No	menciona	manejo	de	resultados incompletos	
Notificación selectiva de los resultados	Bajo	Reportan   resultados   de   acuerdo   con   los objetivos y metodología planteados	


Working  It  Out:  Development  and  Testing  of  a  Multimedia,  Vocational  Education Program (Butler/2004)	
Diseño de estudio	Ensayo clínico aleatorizado	

Población	Adultos residentes y pacientes con salida de los servicios del Hospital de Massachusetts entre 2000 y 2001 que referenciaron problemas de empleo	


Lugar	Hospital  de  Massachusetts.  New  Hampshire,  Vermont, Rhodel Island y New Mexico	
Tamaño de muestra (número de participantes)	
194		
Intervención	Intervención psicoeducacional por medio de  interacción multimedia "WORKING IT OUT"	
Comparador	Material impreso	

Hipótesis de investigación	El programa Working It Out podría mejorar el grado de satisfacción y significancia para reducir los problemas de empleo frente a los resultados de la consulta del material impreso.	

Desenlaces  evaluados  y técnica de medición	1- Satisfacción vocacional. 2. clasificación de las variable problemática. Técnica de medición: Addiction Severity Index (ASI). Cuestionario de empleo y revision de servicios de tratamiento.	

Resultados	MANOVA: Disminuyen problemas de empleo en cada grupo, pero no hay diferencia significativa intervención vs control (M=0.75, seguimiento M=0.67; F (1,126)=10.28, p=0.002).	
Tiempo de seguimiento	6 meses		
Pérdidas (%)	20.6%		
Fuente de financiación	No refiere		


Conclusiones	La autoadministración de programas computarizados e interactivos multimedia mejora la percepción de problemas de empleo. El programa CD.ROM no produce resultados superiores frente al material impreso. Quienes interactúan con los dos tipos de material se benefician de los métodos. Es mejor el reporte de experiencia sugerido para el CD.ROM	
  Riesgo de sesgo 		
Sesgo	Evaluación	Apoyo para la Evaluación	
Generación de la Secuencia aleatorizada	No claro	No aclaran generación de la secuencia	
Ocultación de la asignación	Alto	No se menciona en el estudio	
Cegamiento de los participantes y del personal	
Alto	
No hubo cegamiento	
Cegamiento de los evaluadores	Alto	No hubo cegamiento	
Manejo de los datos de resultado incompletos	Alto	No	menciona	manejo	de	resultados incompletos	


Notificación selectiva de los resultados	Bajo	Reportan   resultados   de   acuerdo   con   los objetivos y metodología planteados	


Prevention  of  severe  hypoglycaemia  in  type  I  diabetes:  a  randomised  controlled population study. (Nordfeldt/2003)	
Diseño de estudio	Ensayo controlado aleatorizado	
Población	Pacientes con Diabetes tipo I entre 2,5 y 18,9 años	
Lugar	Medical	Technology	Assessment	en	Universidad	de Linköping	
Tamaño de muestra (número de participantes)	n=332(intervención n=111/ control n=111 / tradicionales n=110)	
Intervención	Cuestionario audiovisual (video)	
Comparador	Cuestionario visual análogo (escalas)	


Hipótesis de investigación	Proponer nuevos desarrollos gráficos para los pacientes podría mejorar en la prevención síntomas severos de hipoglicemia y los efectos negativos del autotratamiento. La hipótesis central  indica que  la buena calidad del material de auto estudio dirigido a casa puede: 1. ser usado y diseminado de manera ágil. 2. tener mayor ayuda para el autotratamiento 3. Reducir las crisis hipoglucémicas.	
Desenlaces  evaluados  y técnica de medición	Reducción de la incidencia de cuadros severos de hipoglicemia. Mejorar las actitudes y los niveles de uso de la información disponibles en los materiales de consulta.	

Resultados	Después de la intervención, la incidencia de hipoglicemia severa durante el 2000 se redujo en el grupo intervención de 42% a 27% comparado con 1999 (diferencia de riesgo 15%,95% CI 1% - 29%, p = 0.0394).	
Tiempo de seguimiento	Un año	
Pérdidas (%)	21.3%	


Fuente de financiación	The Swedish Child Diabetes Foundation (Barndiabetesfonden), the Health Research Council en el sudeste de Suecia (FORSS), Swedish National Road Administration (Vägverket), y el Centro para Tecnología Médica	


Conclusiones	Las estrategias pedagógicas para el hogar y los soportes para aprender sobre la diabetes en términos de autocuidado son un elemento principal para la prevención de casos agudos de hipoglicemia. Implica una distribución masiva además de que no se centra en un solo tipo de contenidos o áreas de información, lo que puede impactar positivamente otros tipos de contenidos e información en salud. Considerando que existen diversos niveles de preferencias y grados de educación, los videos pueden ser una buena alternativa en términos de calidad y consumidor. Pueden acarrear desarrollo de diferentes edades.	
  Riesgo de sesgo 		
Sesgo	Evaluación	Apoyo para la Evaluación	
Generación de la Secuencia aleatorizada	Bajo	Asignación empleando números aleatorios	
Ocultación de la asignación	Alto	No se menciona en el estudio	
Cegamiento de los participantes y del personal	
Bajo	Participantes y personal cegados  a asignación hasta cuando fue posible mantenerla	
Cegamiento de los evaluadores	Alto	No hubo cegamiento	
Manejo de los datos de resultado incompletos	Bajo	Análisis por intención a tratar	
Notificación selectiva de los resultados	Bajo	Reportan   resultados   de   acuerdo   con   los objetivos y metodología planteados	


Retention of CPR skills learned in a traditional AHA Heartsaver course versus 30-min video self-training: A controlled randomized study. (Einspruch/2007)	
Diseño de estudio	Ensayo controlado aleatorizado	

Población	Pacientes entre los 40 y 70 años de edad sin historial de entrenamiento en reanimación cardiopulmonar en los últimos 5 años	
Lugar	Portland, Oregon	
Tamaño de muestra (número de participantes)	
n=285 (intervención n=145/ control n=140)	
Intervención	Video de auto entrenamiento VSI	
Comparador	Intervención tradicional	
Hipótesis de investigación	No especifica	


Desenlaces  evaluados  y técnica de medición	Adecuado o inadecuado para cada indicador: evaluar respuesta, llamar al 911, volumen de ventilaciones, profundidad de las compresiones del pecho, colocación de las manos durante las compresiones y desempeño general durante la RCP	


Resultados	Comparación control vs intervención
Desempeño general: Después del entrenamiento 42% vs 60%, dos meses después 30% vs 44%. Evaluar respuesta: Después del entrenamiento 72% vs 90%, dos meses después   60%   vs   77%.   Llamada   911:   Después   del
entrenamiento 82% vs 71%, dos meses después 74% vs 53%. Media de ventilaciones: Después del entrenamiento 40% vs 61%, dos meses después 36% vs 41%. Desempeño general: Después del entrenamiento 42% vs 60%, dos meses después 30% vs 44%. Media porcentual de compresiones: Después del entrenamiento 68% vs 80%, dos meses después 59% vs 64%. Desempeño general: Después del entrenamiento 42% vs 60%, dos meses después 30% vs 44%. Compresiones adecuadas: Después del entrenamiento 48% vs 38%, dos meses después 49%
vs 48%	
Tiempo de seguimiento	Dos meses		
Pérdidas (%)	No es claro		
Fuente de financiación	American Heart Association	


Conclusiones	Adultos entre 40 y 70 años de edad que participaron en un programa de  entrenamiento de  CPR por video, experimentaron un deterioro en sus habilidades después de un intervalo de dos meses. Sin embargo, este deterioro no fue mayor al observado en el programa de entrenamiento Heartsaver. El programa VSI produjo una mejor retención, al menos tan Buena como la observada con el entrenamiento tradicional. Se necesitan esfuerzos adicionales para mejorar tanto el desempeño inicial como la retención de habilidades de CPR	
  Riesgo de sesgo 		
Sesgo	Evaluación	Apoyo para la Evaluación	
Generación de la Secuencia aleatorizada	No claro	No se menciona generación de la secuencia	
Ocultación de la asignación	Alto	No se menciona en el estudio	
Cegamiento de los participantes y del personal	
Bajo	
Investigadores cegados a asignación	
Cegamiento de los evaluadores	Alto	No hubo cegamiento	


Manejo de los datos de resultado incompletos	Alto	No	menciona	manejo	de	resultados incompletos	
Notificación selectiva de los resultados	Bajo	Reportan   resultados   de   acuerdo   con   los objetivos y metodología planteados	


Reduction  in  dental  plaque  in  patients  with  mental  disorders  through  the  dental hygiene care programme. (Mun/2013)	
Diseño de estudio	Ensayo clínico aleatorizado	

Población	Pacientes adultos diagnosticados con esquizofrenia, desordenes psicoafectivos, desordenes  bipolares, depresión y/o algún desorden mental	
Lugar	Programa  de  atención  y  cuidado  diario  del  Gangwon Province y hospital psiquiátrico	
Tamaño de muestra (número de participantes)	
n=92	
Intervención	Video (flash) 10 minutos + practica de lavado de dientes	
Comparador	Practica de lavado de dientes + material impreso	
Hipótesis de investigación	El uso de material audiovisual incrementa el monitoreo y eficacia del cepillado, frente a la técnica convencional	
Desenlaces  evaluados  y técnica de medición	PHP para evaluar placa, xerostomía evaluada con flujo salivar estimulado y preguntas sobre resequedad, actividad dental de caries con Cariview y Dentocult	


Resultados	PHP: 12 semanas media, SD; Grupo A: 2.07 ± 1.06, Grupo B: 1.72 ± 0.84, Grupo C: 2.32 ± 1.00. Cambios después de 5
minutos de estimulación salivar: 12 semanas media, SD
Grupo A: 3.71 ±3.69, Grupo B: 3.22 ±2.32, Grupo C: 4.15 ±
3.81. Cambios en resequedad oral subjetiva: 12 semanas
media, SD Grupo A: 2.39 ± 2.57, Grupo B: 2.45 ± 2.24,
Grupo C: 2.67 ± 2.22. Cariview, cambio en la producción de
ácido de las bacterias orales: 12 semanas media, SD: Grupo
A: 68.55 ± 7.59, Grupo B: 70.08 ± 6.64, Grupo C: 66.55 ±
8.97	
Tiempo de seguimiento	12 semanas	
Pérdidas (%)	17%	
Fuente de financiación	Beca de investigación de Yonsei University Wonju College of Medicine (YUWCM-2012-63).	

Conclusiones	El programa de cuidado e higiene dental realizado en flash y cuatro folletos impresos son una efectiva estrategia para reducir la cantidad de placa bacteriana en pacientes con desórdenes mentales.	
  Riesgo de sesgo 		


Sesgo	Evaluación	Apoyo para la Evaluación	
Generación de la Secuencia aleatorizada	No claro	No menciona generación de la secuencia	
Ocultación de la asignación	No claro	No se menciona en el estudio	
Cegamiento de los participantes y del personal	No claro	
No hubo cegamiento	
Cegamiento de los evaluadores	No claro	No hubo cegamiento	
Manejo de los datos de resultado incompletos	Alto	No	menciona	manejo	de	resultados incompletos	

Notificación selectiva de los resultados	
No claro	El objetivo del estudio era desarrollar un programa, sin embargo, el artículo está estructurado como un ensayo clínico aleatorizado	


Effect  of  a  home  exercise  video  programme  in  patients  with  chronic  obstructive pulmonary disease (Moore/2009)	
Diseño de estudio	Ensayo controlado aleatorizado	
Población	Pacientes con EPOC	
Lugar	Ambulatorio	
Tamaño de muestra (número de participantes)	
n=27 (final: n=20 intervención n= 10/ control n=10)	
Intervención	Video  de  los  beneficios  del  ejercicio  diario  +  cartilla educativa de EPOC	
Comparador	Cartilla educativa de EPOC	
Hipótesis de investigación	Un programa de ejercicio basado en instrucciones de video para el hogar puede mejorar las habilidades de marcha, respiración y la calidad de vida	
Desenlaces  evaluados  y técnica de medición	1. Incremento de tiempo de reporte de actividad física. 2. incremento en la sensación de calidad de vida en términos de satisfacción y comprensión. 3. menor grado de fatiga	


Resultados	Incremental Shuttle Walk Test: Control 175 (39–215) vs intervención 200(69–333), p=0.013.Chronic Respiratory Disease Questionnaire (CRQ) Disnea: Control 2.5(2.0–3.2) vs intervención 3.6 (2.6–4.4), p=0.042. Chronic Respiratory Disease Questionnaire (CRQ) Fatiga: Control 2.5(1.9–4.5) vs intervención 4.9(4–5.1), p=0.012. Chronic Respiratory Disease Questionnaire (CRQ) Emoción: Control 4(2.9–5.9) vs intervención 5.4(4.8–6), p<0.001.
Chronic Respiratory Disease Questionnaire (CRQ) Maestría: Control 4.5(3–5.4) vs intervención 5.4(4.6–5.9), p=0.253	
Tiempo de seguimiento	4 sesiones por semana durante 1 mes	
Pérdidas (%)	25%		
Fuente de financiación	Southwark Primary Care	

Conclusiones	Se sugiere que aplicar un video de acompañamiento y seguimiento de actividad física para la casa puede tener beneficios en la calidad de vida de los pacientes con EPOC	
  Riesgo de sesgo 		
Sesgo	Evaluación	Apoyo para la Evaluación	
Generación de la Secuencia aleatorizada	Bajo	Aleatorizados	con	estrategia	de minimización	
Ocultación de la asignación	Alto	No se menciona en el estudio	
Cegamiento de los participantes y del personal	
Alto	
No hubo cegamiento	
Cegamiento de los evaluadores	No claro	Fue  difícil  mantener  el  cegamiento  de  los investigadores	
Manejo de los datos de resultado incompletos	Alto	No	menciona	manejo	de	resultados incompletos	
Notificación selectiva de los resultados	Bajo	Reportan   resultados   de   acuerdo   con   los objetivos y metodología planteados	


Preliminary efficacy of a computer-delivered HIV prevention intervention for African American teenage females. (Klein/2011)	
Diseño de estudio	Ensayo controlado aleatorizado	
Población	Adolescente mujeres afroamericanas de 14 a 18 años	
Lugar	Centros de atención a adolescentes	
Tamaño de muestra (número de participantes)	
n=178 (intervención n = 93 / control = 85)	
Intervención	Multimedia SiHLE HIV (2 horas)	


Comparador	Curso de educación tradicional (sesión de 65 minutos)	

Hipótesis de investigación	El Multimedia SiHLE HIV puede promover el uso del condón en las relaciones sexuales, sobre todo en las relaciones vaginales. Esto puede incidir en la autoeficacia del uso del condón.	

Desenlaces  evaluados  y técnica de medición	Satisfacción evaluada con cuestionario, escala de conocimiento sobre VIH, auto-eficacia del uso de condón, escalas de auto-eficacia en comunicación, escala de frecuencia de comunicación sexual	


Resultados	Satisfacción: Participantes evaluaron la intervención de PC de forma más favorable que el control en utilidad (4.86 vs. 4.46, p < .001), importancia (4.81 vs. 4.47, p = .03), interés
(4.24 vs. 3.74, p = .001), entretenimiento (4.06 vs. 3.45, p
< .001), y atractivo (4.36 v. 3.20, p = .01). Uso promedio de condón en grupo intervención mejoró M = 51% al inicio a M = 71% a 3 meses, t(20) = 2.06, p = .05; 95% (CI): .00, .40.
Sin cambios en grupo control. Conocimiento sobe VIH en intervención pasó de M = 5.08 a M = 6.81 en escala de 9 puntos, t(82) = 8.58, p < .001, 95% CI: 1.32, 2.12	
Tiempo de seguimiento	3 meses		
Pérdidas (%)	8.9%		
Fuente de financiación	National	Institute	of	Mental	Health,	Sociometrics translated - SiHLE	


Conclusiones	Los programas de autoadministración computarizada frecuentemente pueden diseminar contenidos en salud a bajos costos y esto puede influenciar en la reducción del riesgo de comportamientos asociados a la transmisión del VIH	
  Riesgo de sesgo 		
Sesgo	Evaluación	Apoyo para la Evaluación	
Generación de la Secuencia aleatorizada	No claro	No se especifica generación de la secuencia aleatoria	
Ocultación de la asignación	Alto	No se menciona en el estudio	
Cegamiento de los participantes y del personal	
Alto	
No hubo cegamiento	
Cegamiento de los evaluadores	Alto	No hubo cegamiento	
Manejo de los datos de resultado incompletos	Alto	No	menciona	manejo	de	resultados incompletos	
Notificación selectiva de los resultados	Bajo	Reportan   resultados   de   acuerdo   con   los objetivos y metodología planteados	
